# Supplementary material for: FLARE: a fast and flexible workflow for identifying RNA editing foci
Source: PubMed Central journal article supplement (PMC10544219; doi:10.1186/s12859-023-05452-4), 2023-10-02

**A**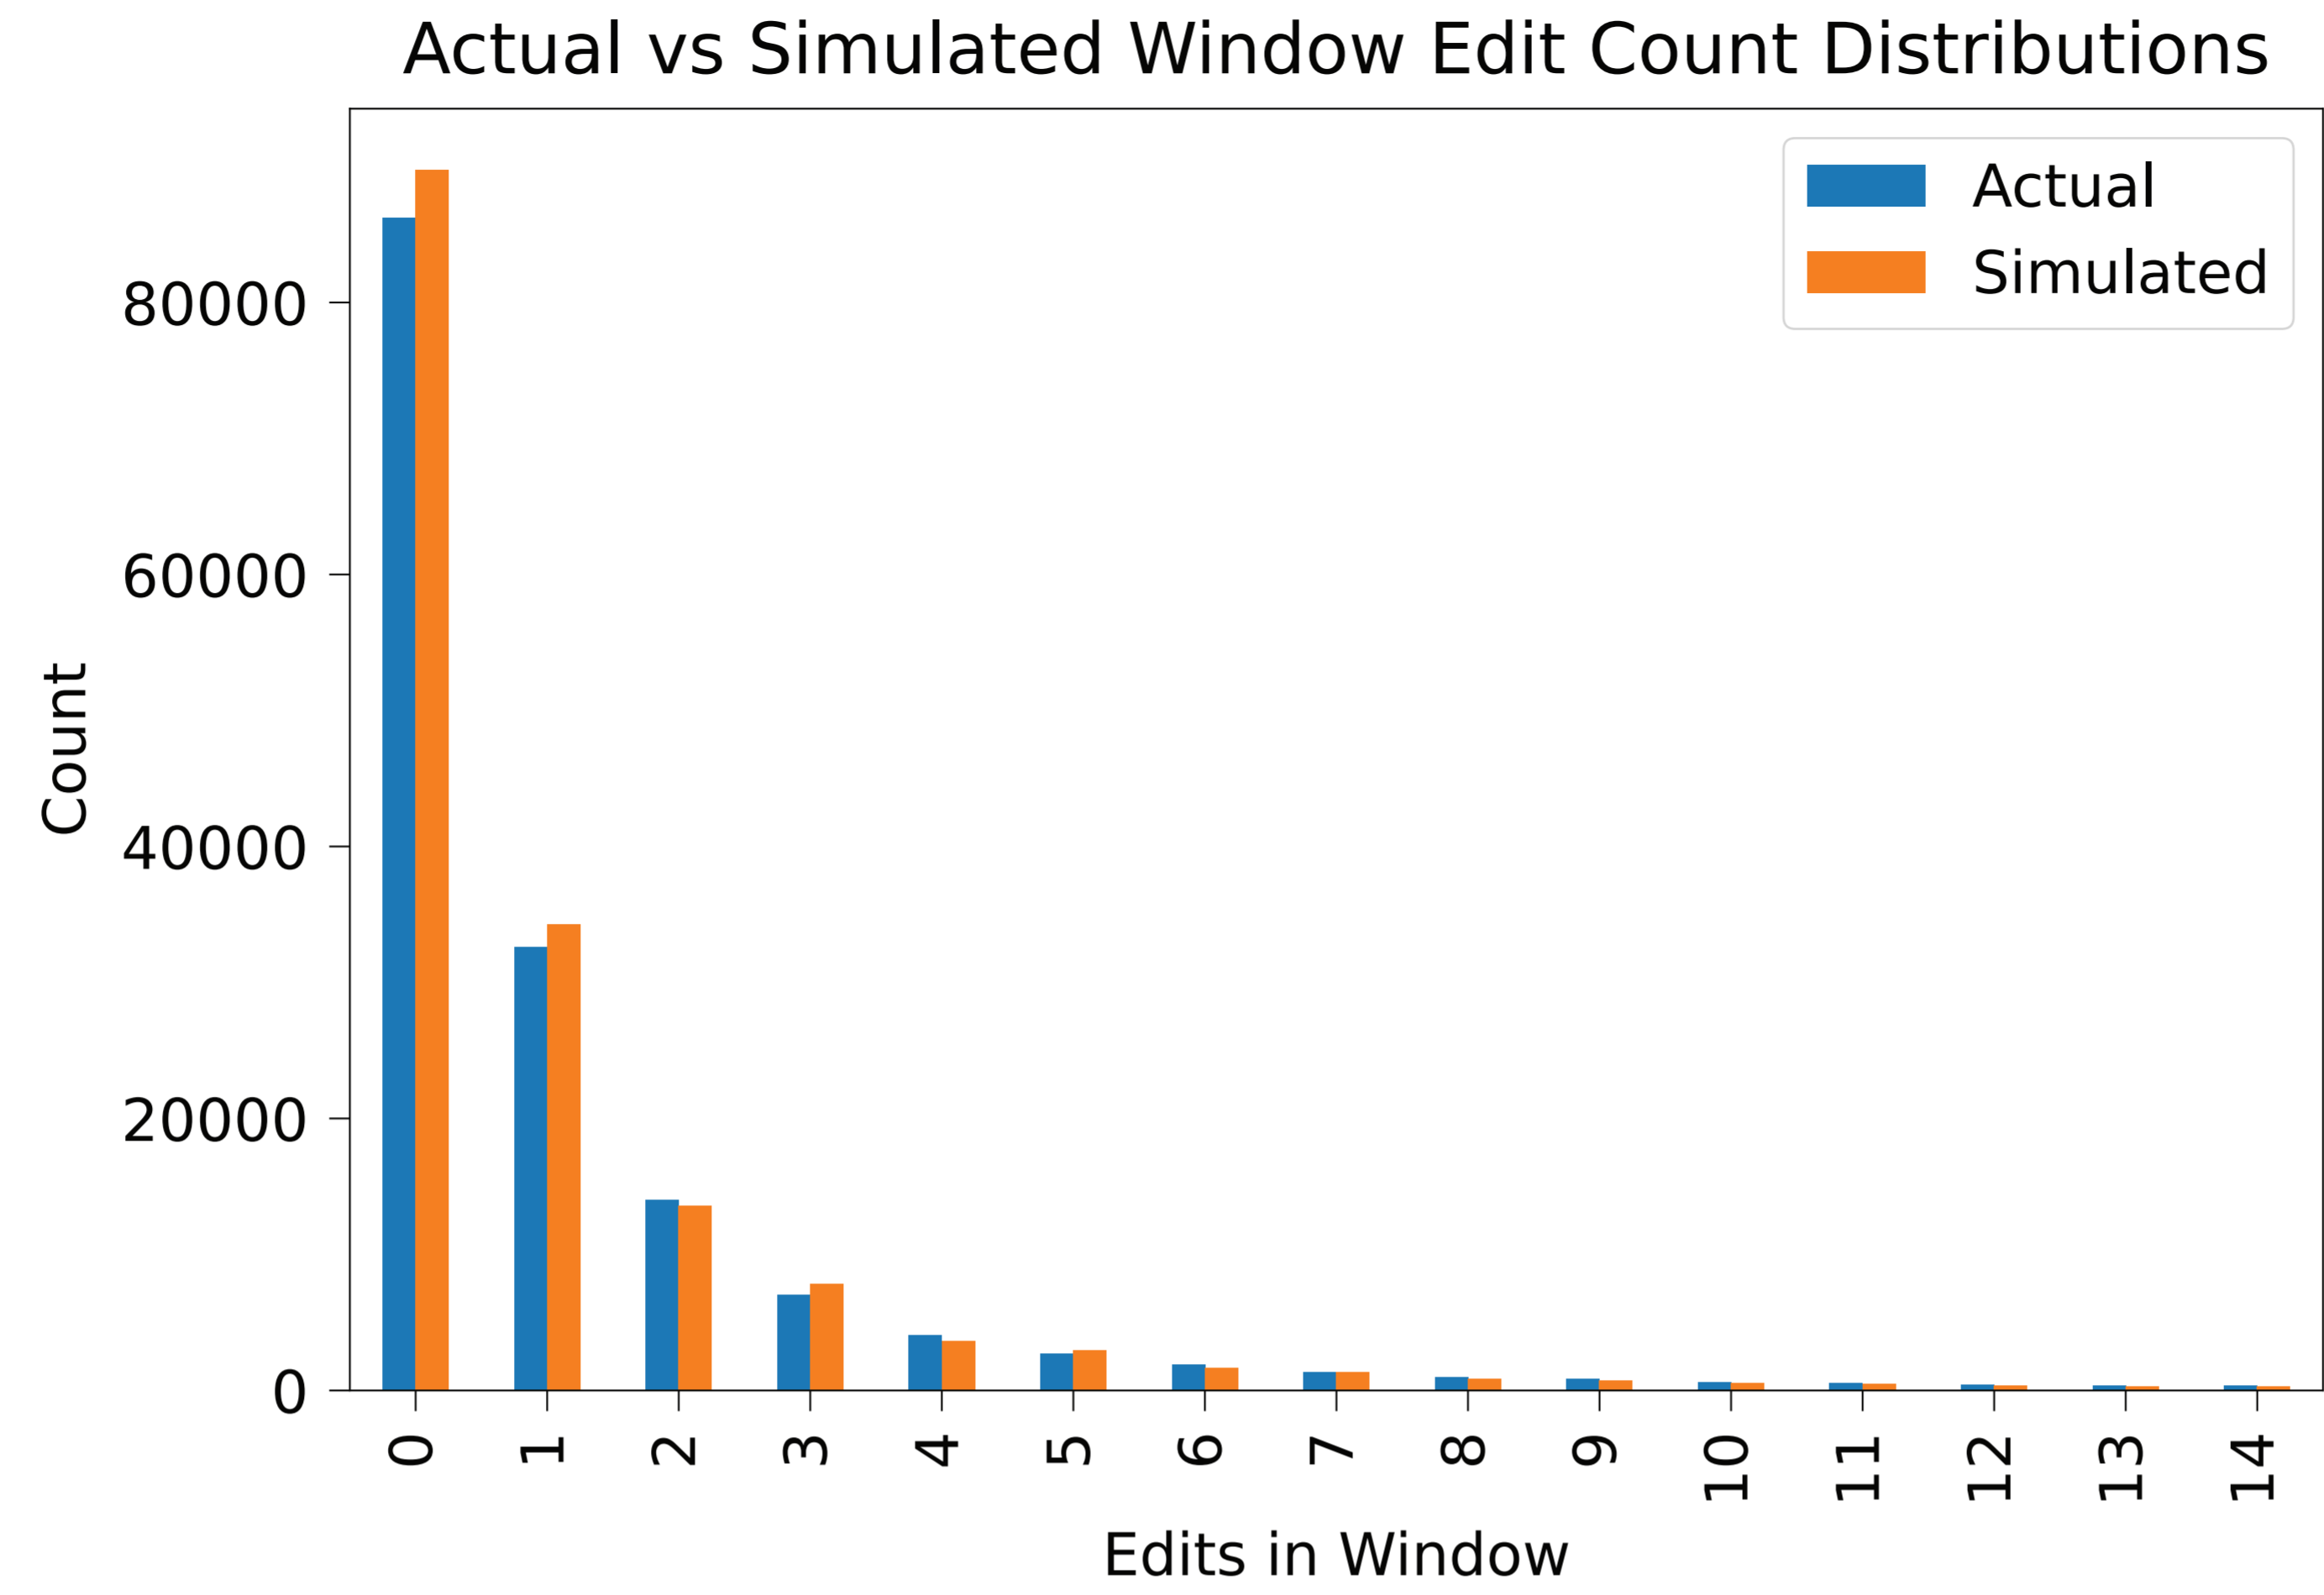**B**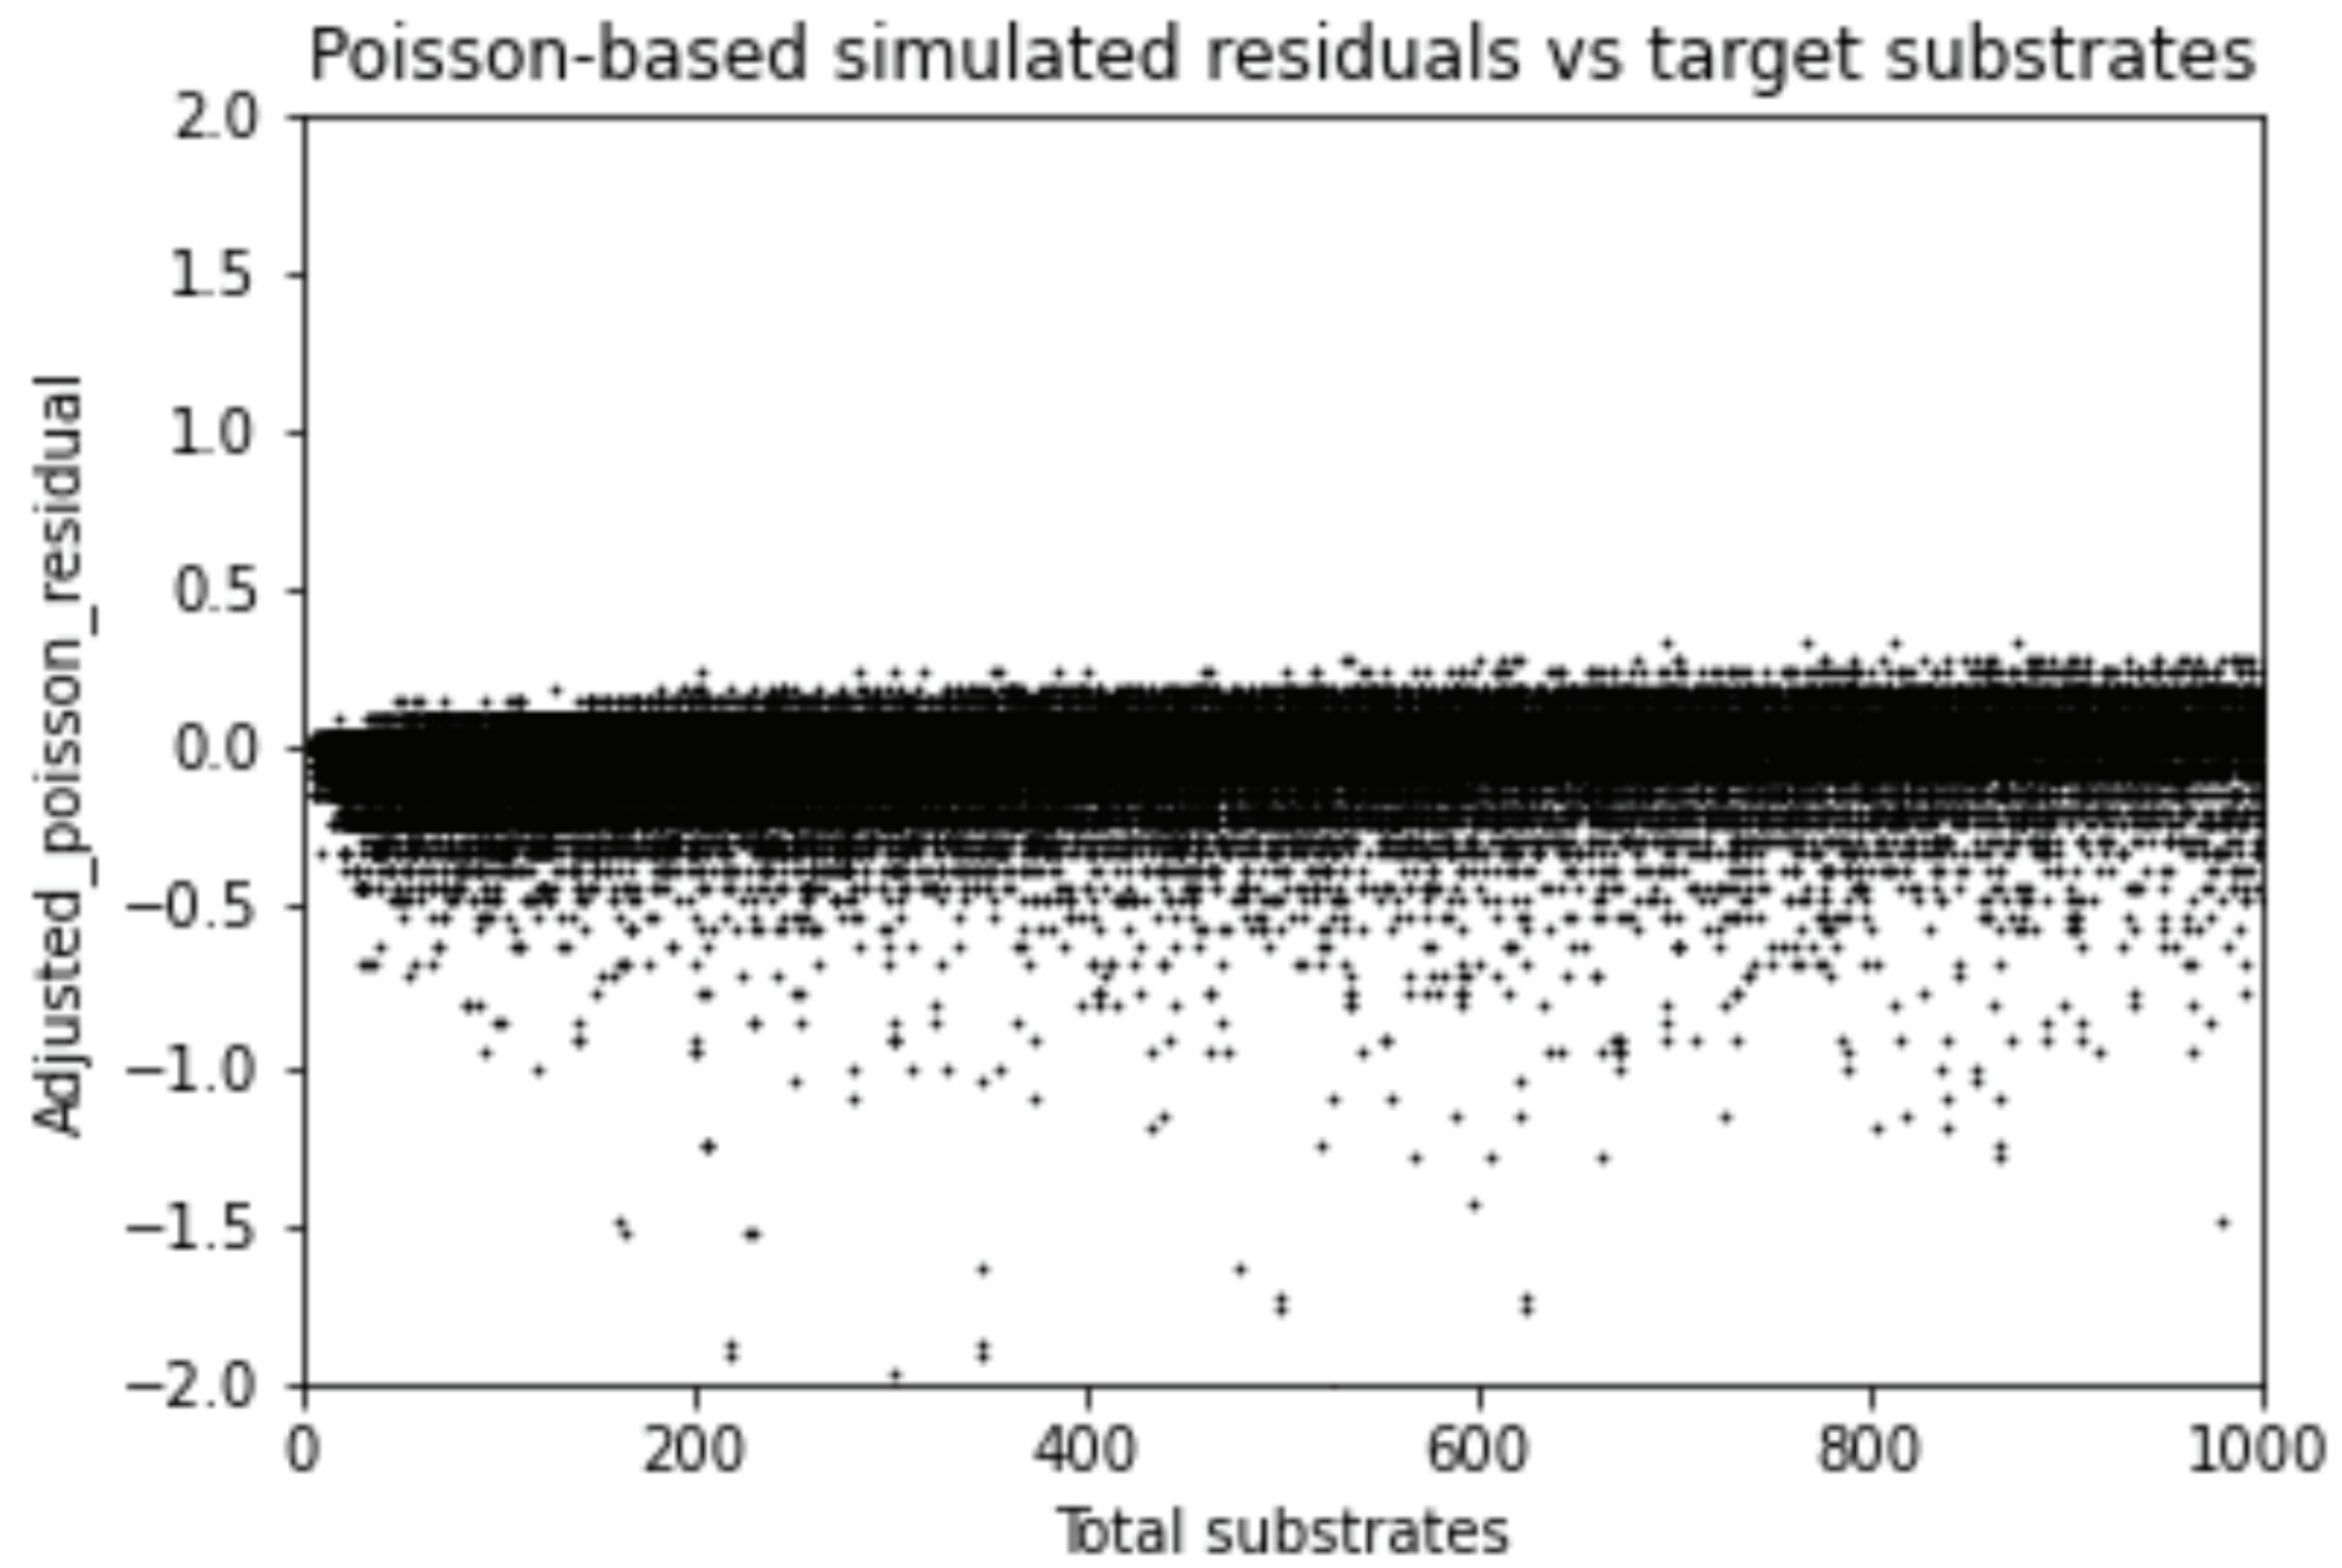**C**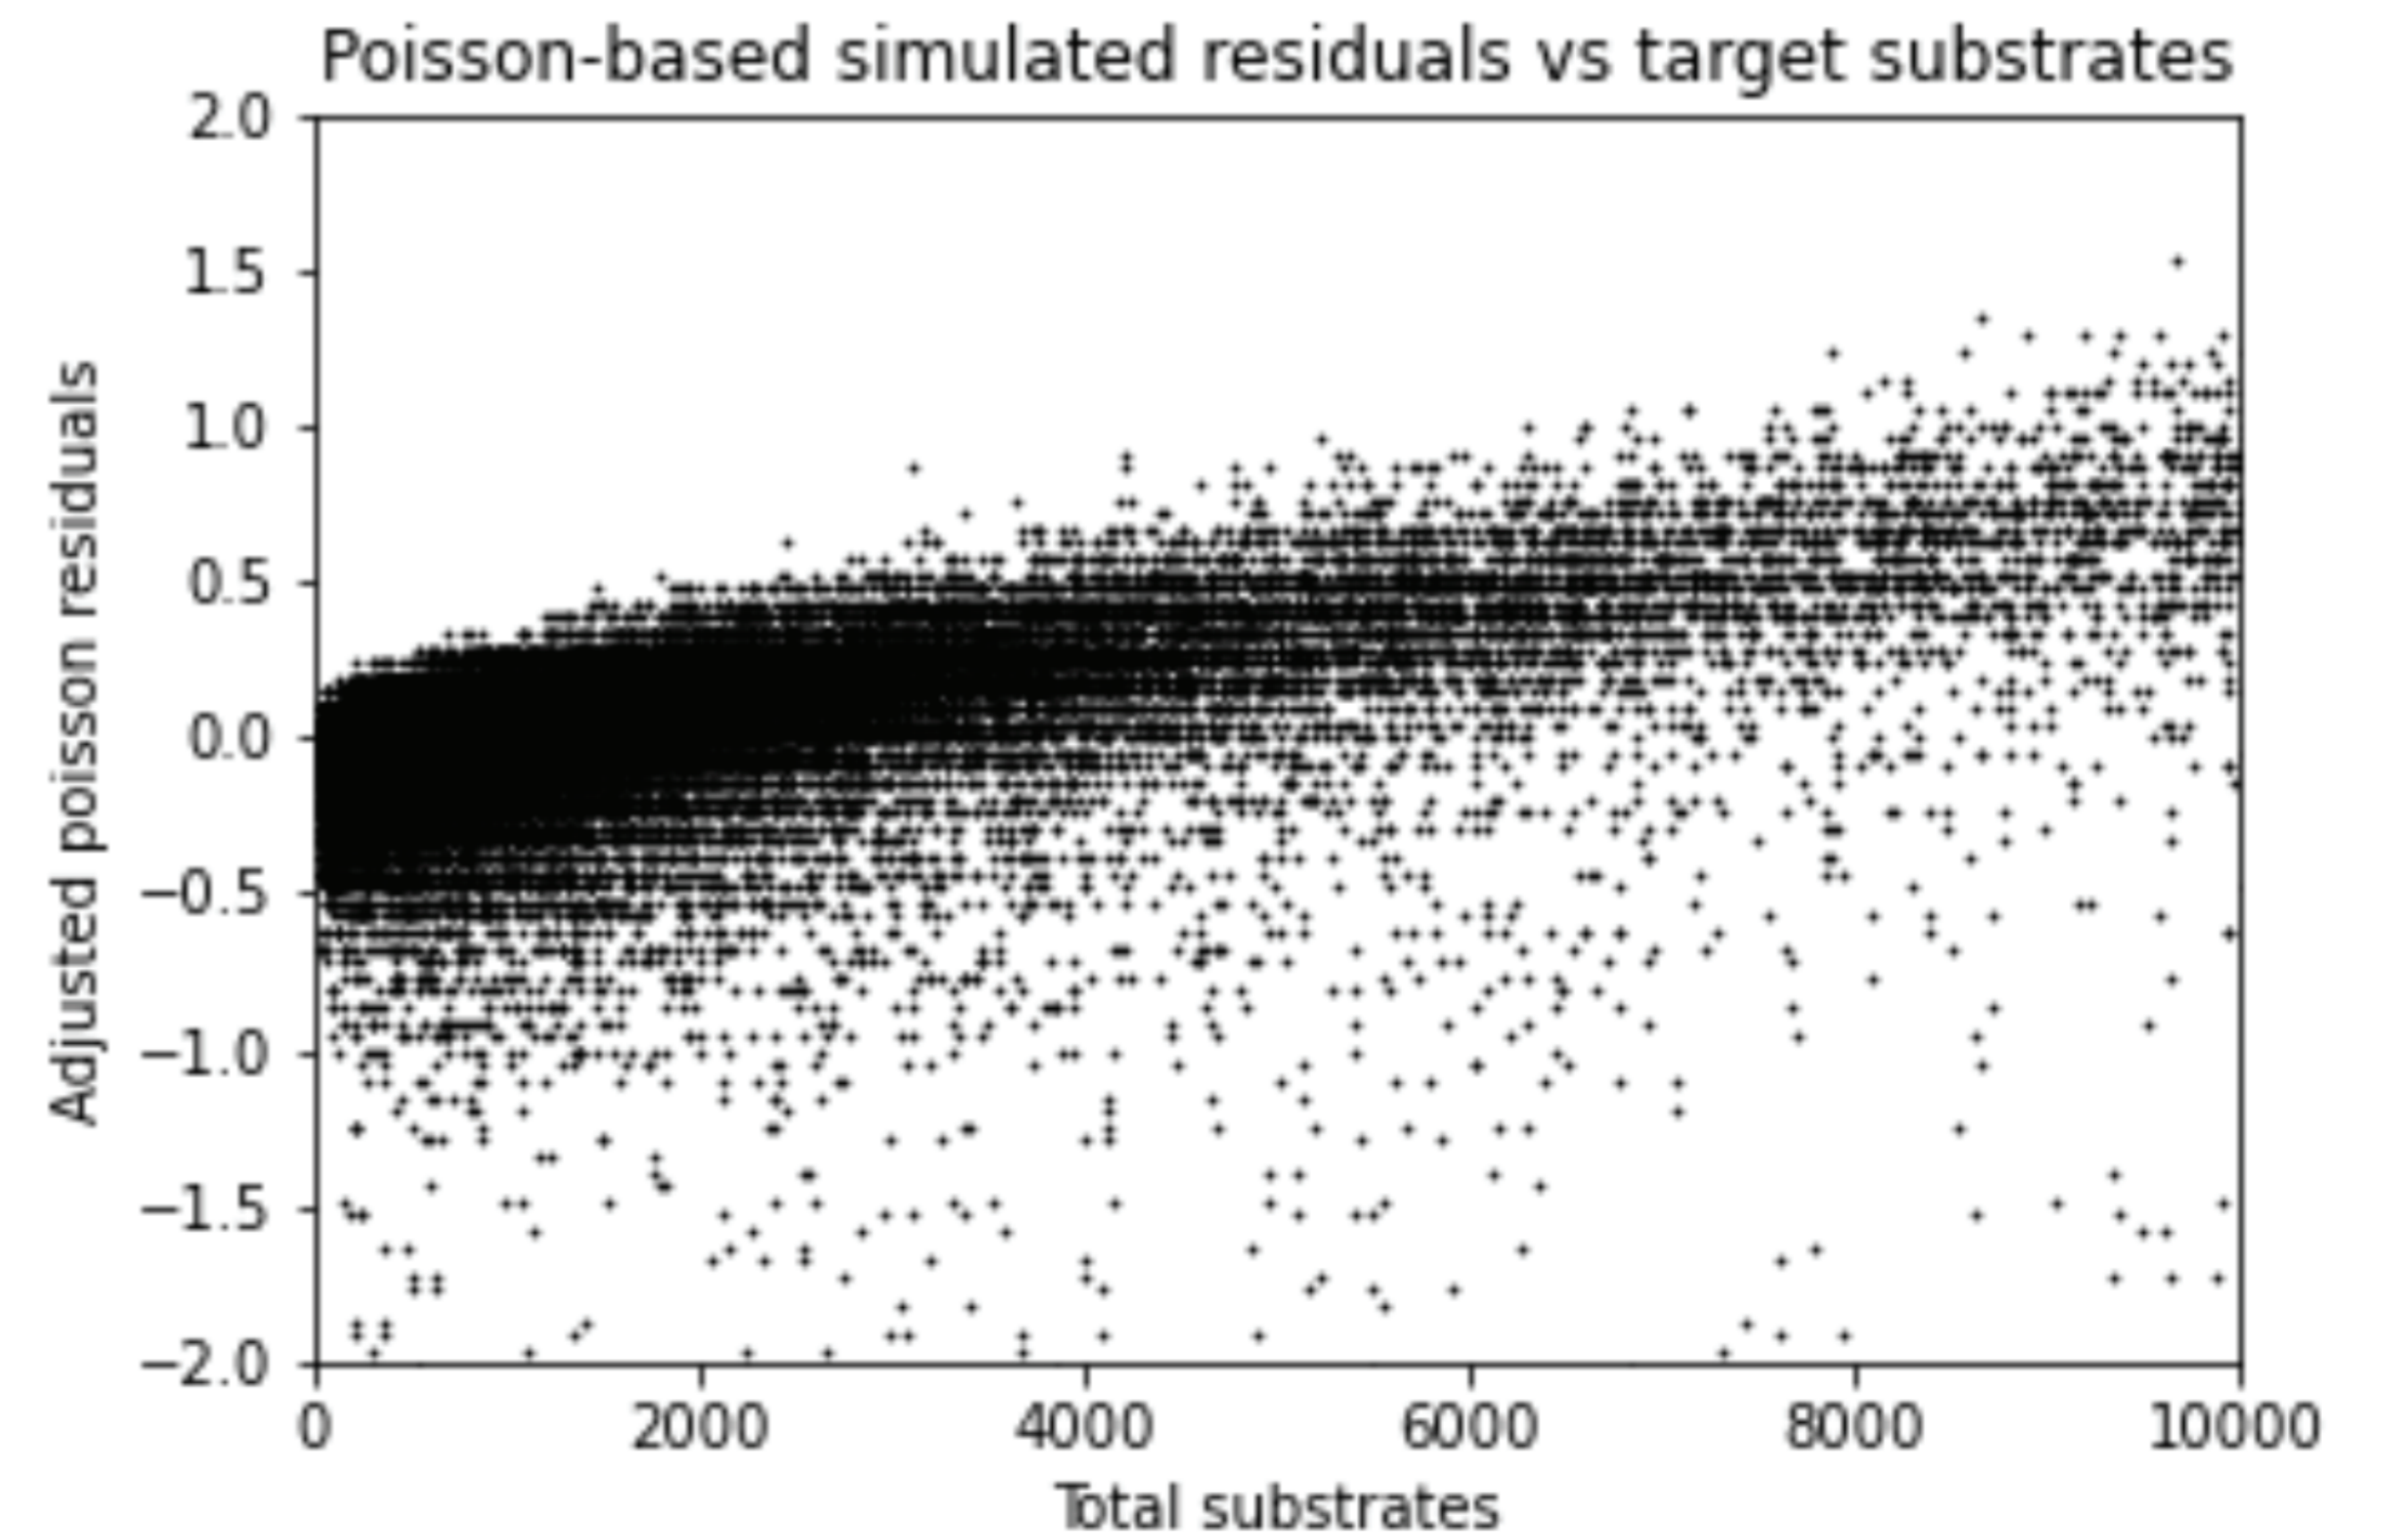

Supplement: 12859_2023_5452_MOESM1_ESM.pdf [file 12859_2023_5452_MOESM1_ESM.pdf]
