# Supplementary material for: FLARE: a fast and flexible workflow for identifying RNA editing foci
Source: PubMed Central journal article supplement (PMC10544219; doi:10.1186/s12859-023-05452-4), 2023-10-02

**A**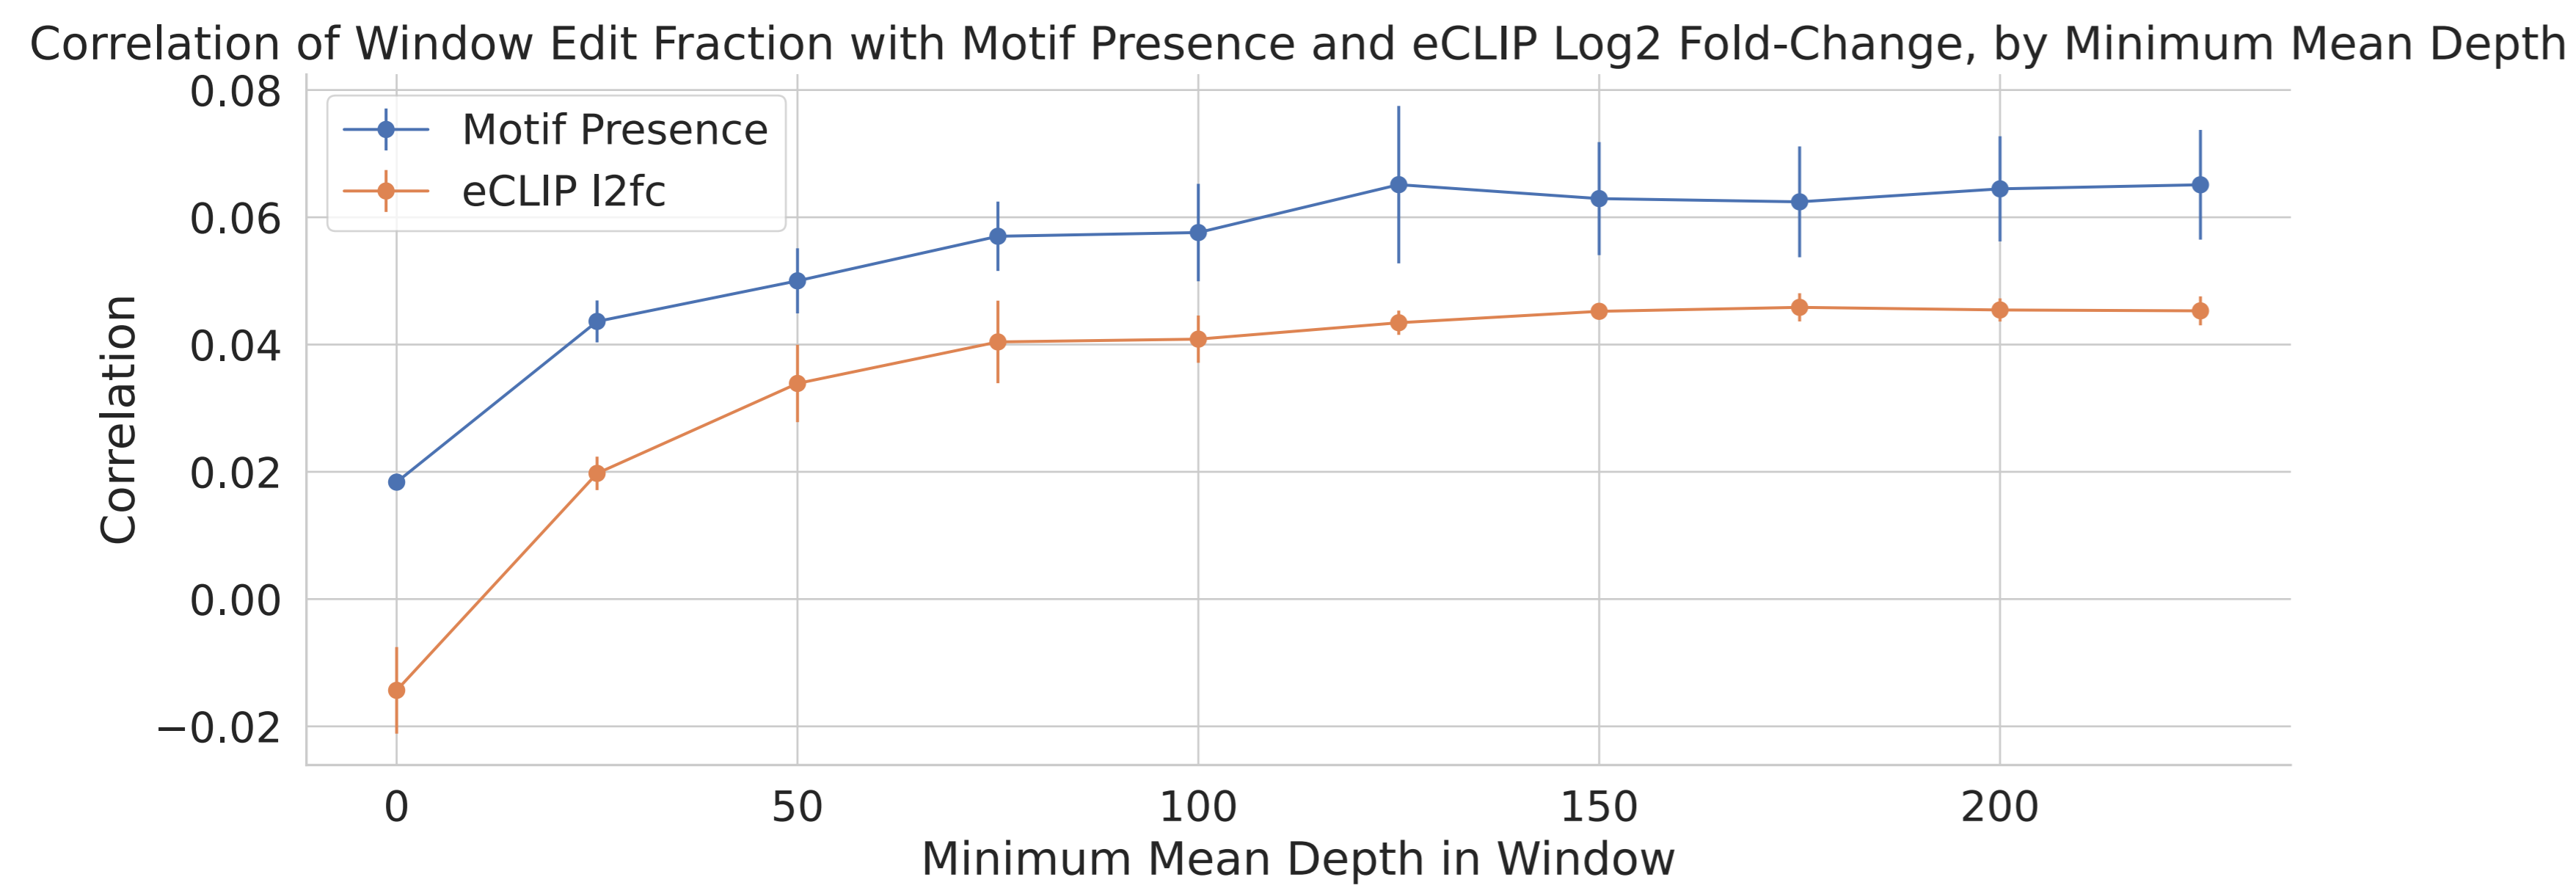**B**

Fraction of site-based clusters with supporting evidence by SAILOR score, average over triplicates

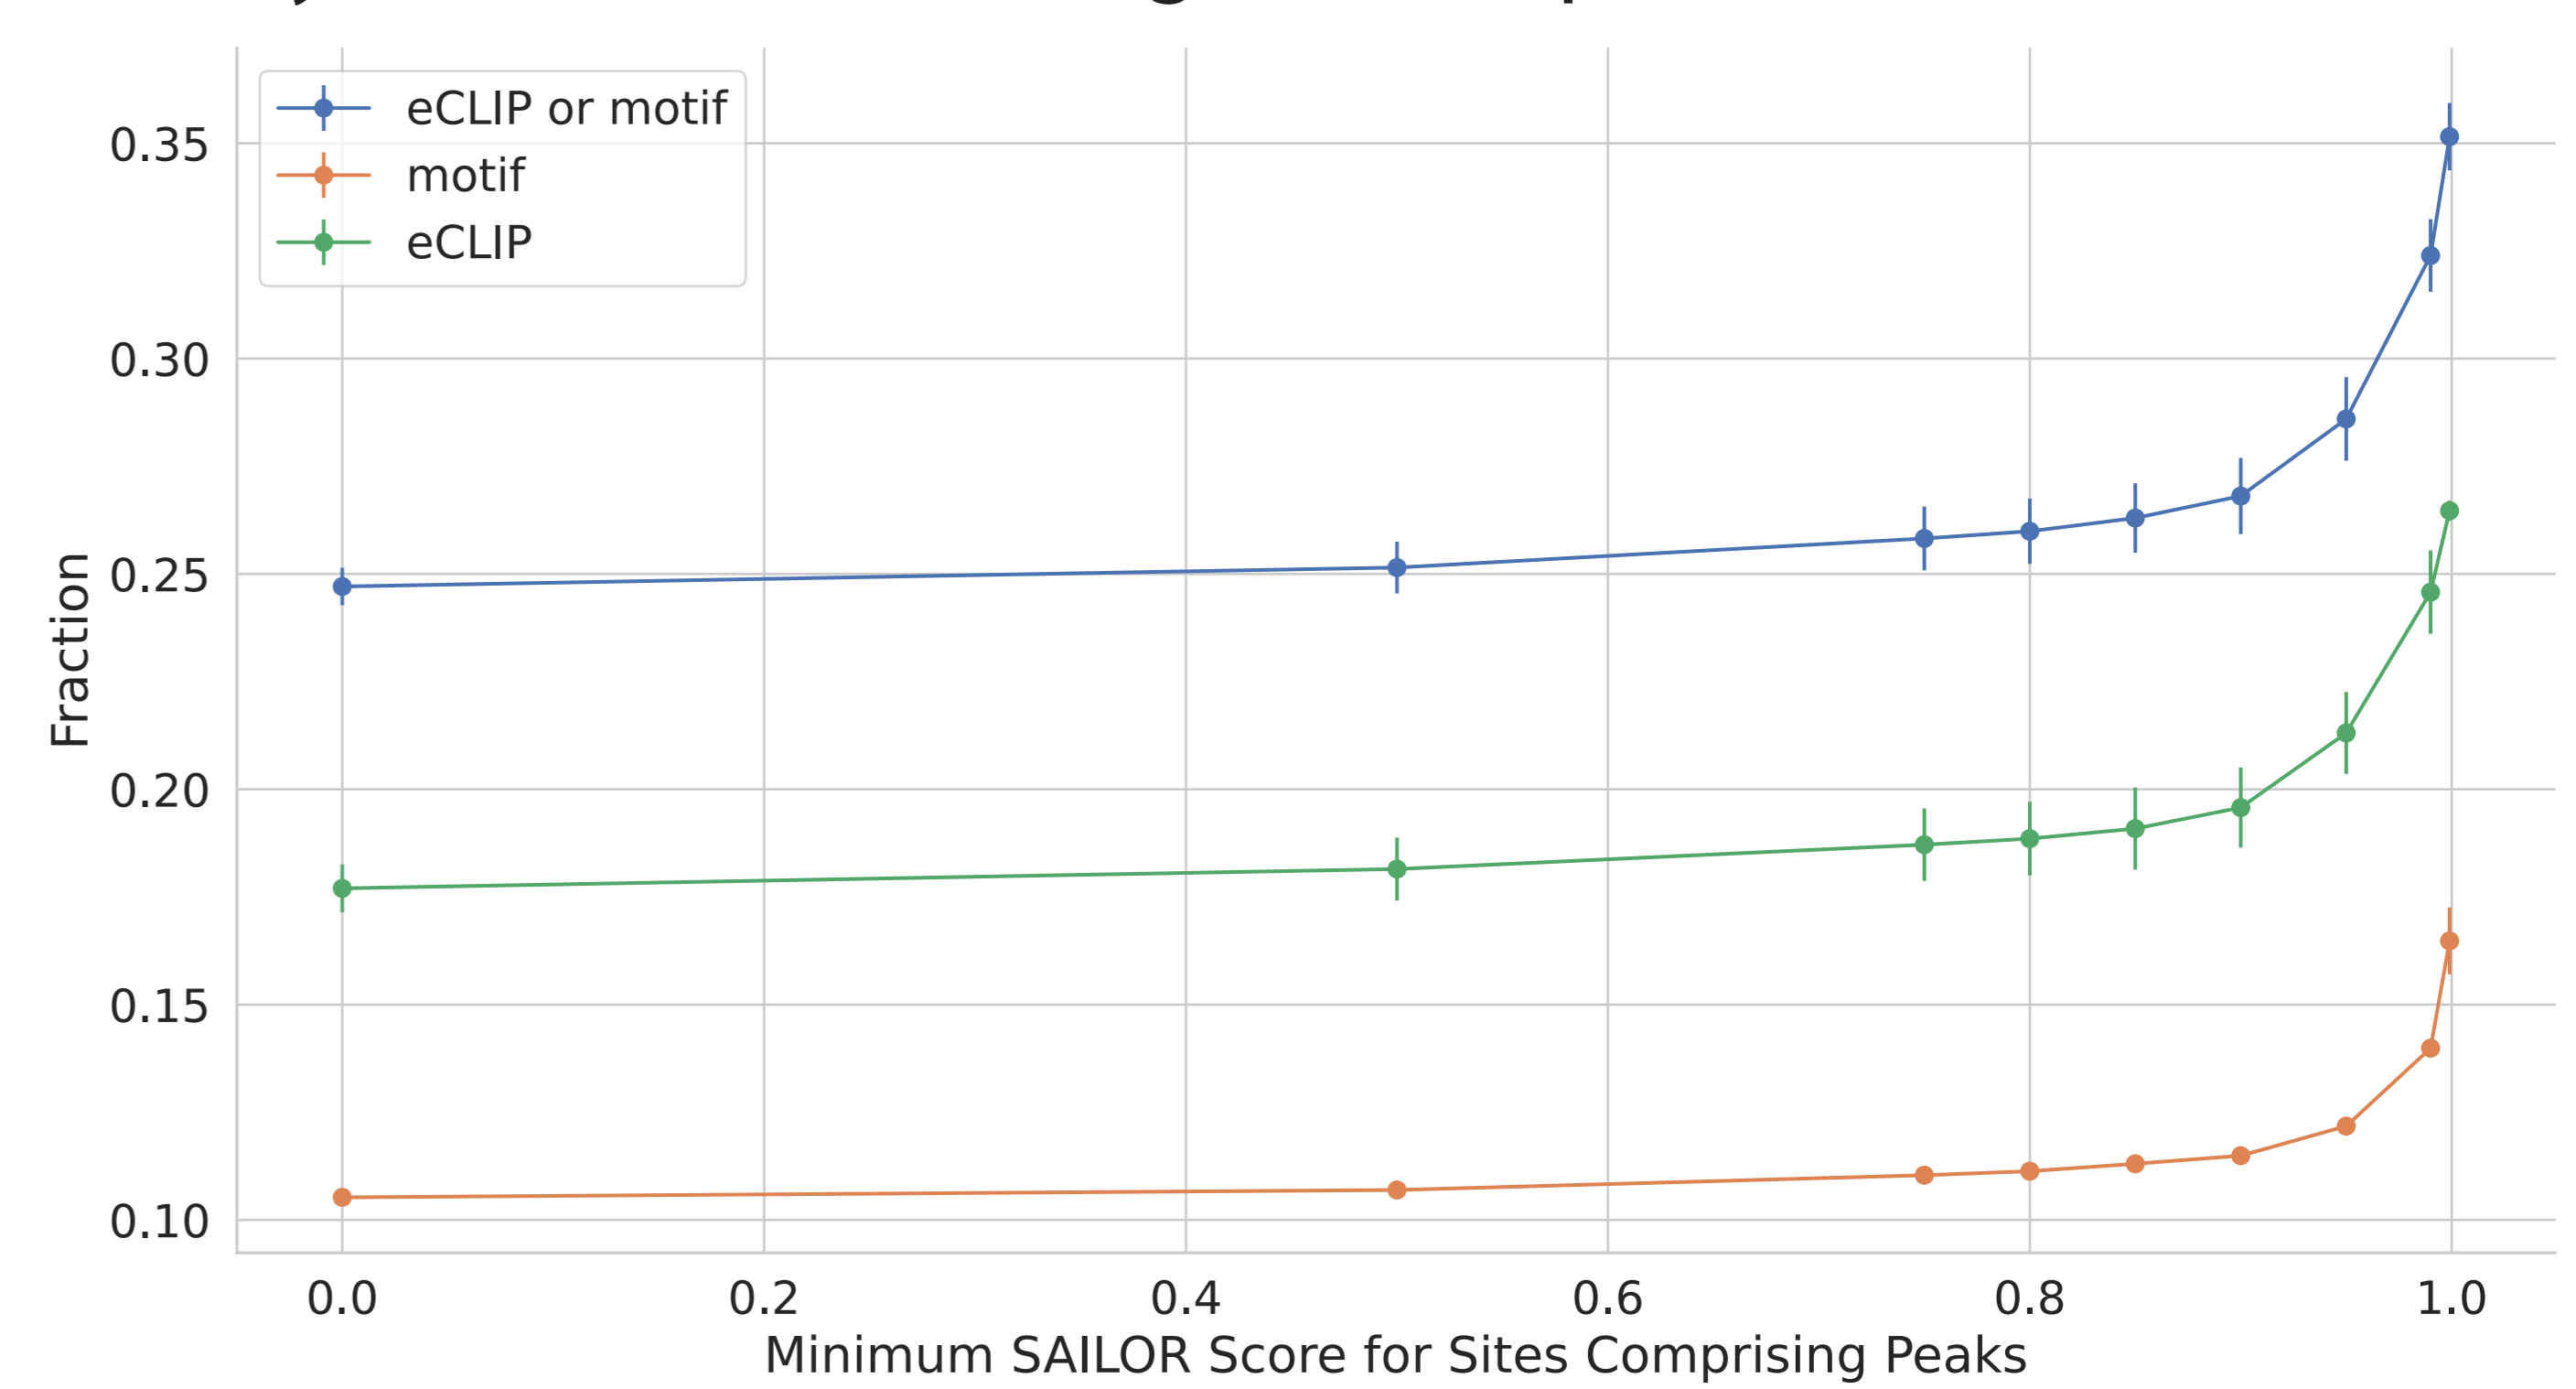**C**

Number of site-based clusters with supporting evidence by SAILOR score, average over triplicates

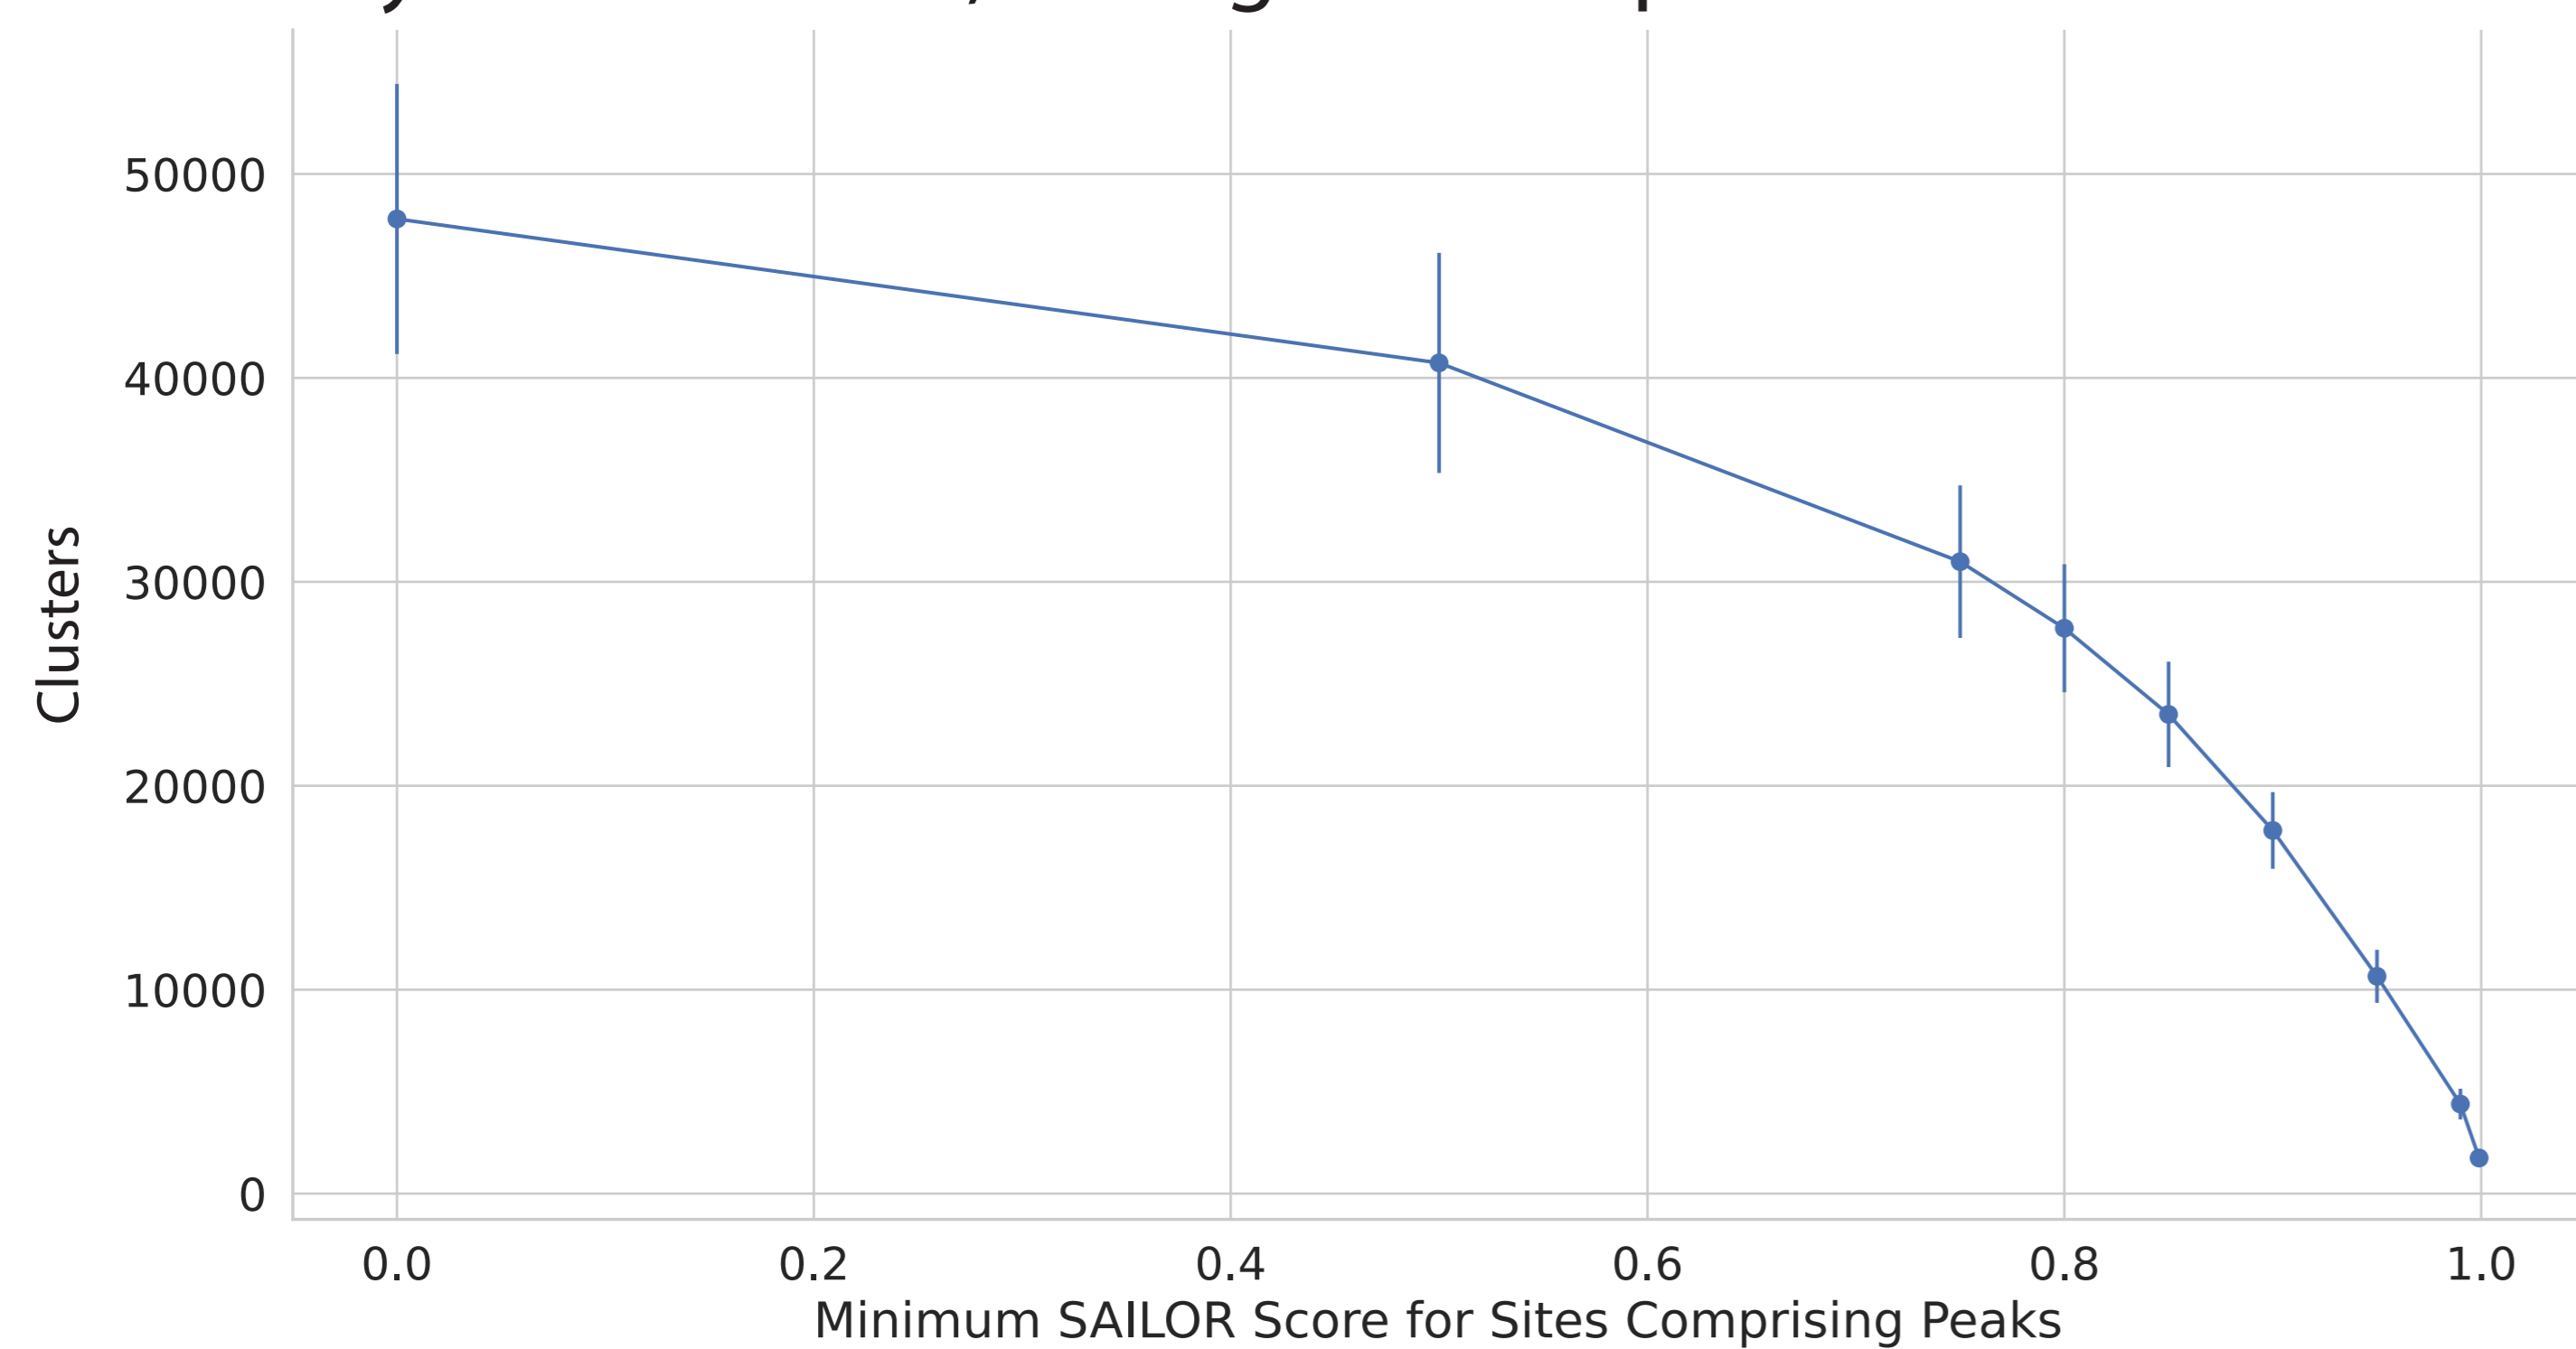**D**

Clusters with either eCLIP or GCATG overlap

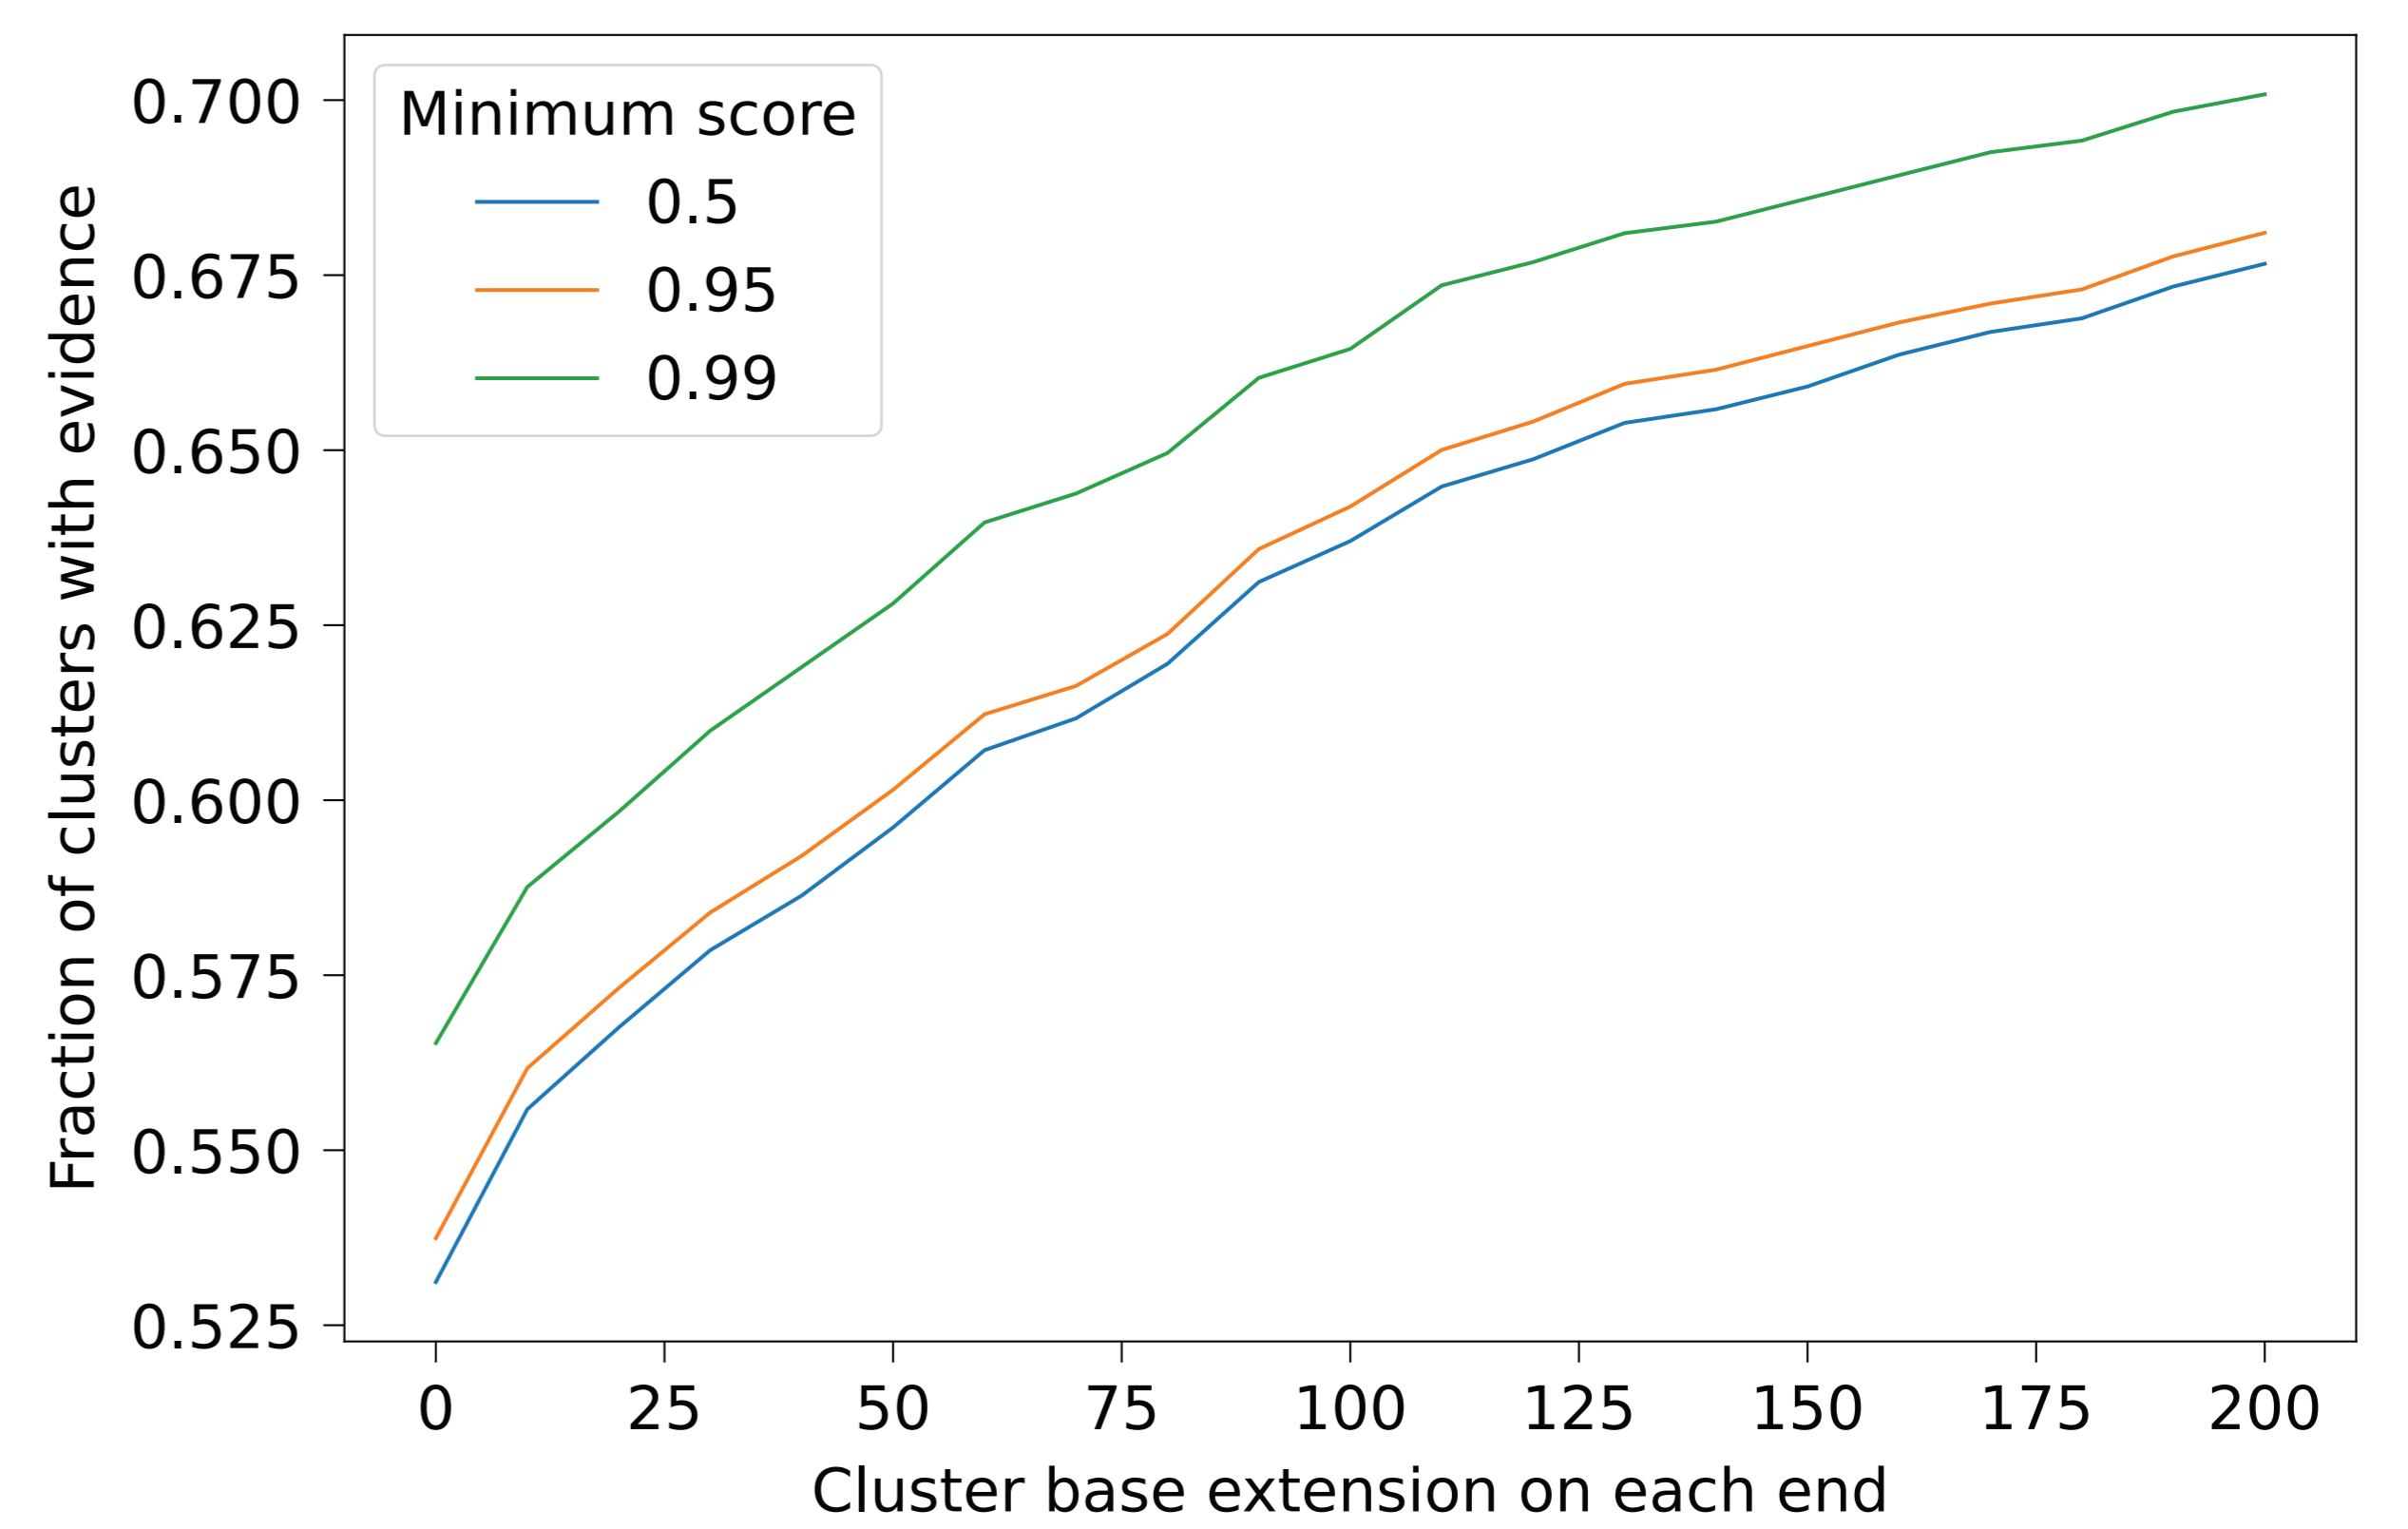**E**

Log2-fold change of fraction with motif for clusters overlapping vs not overlapping eCLIP

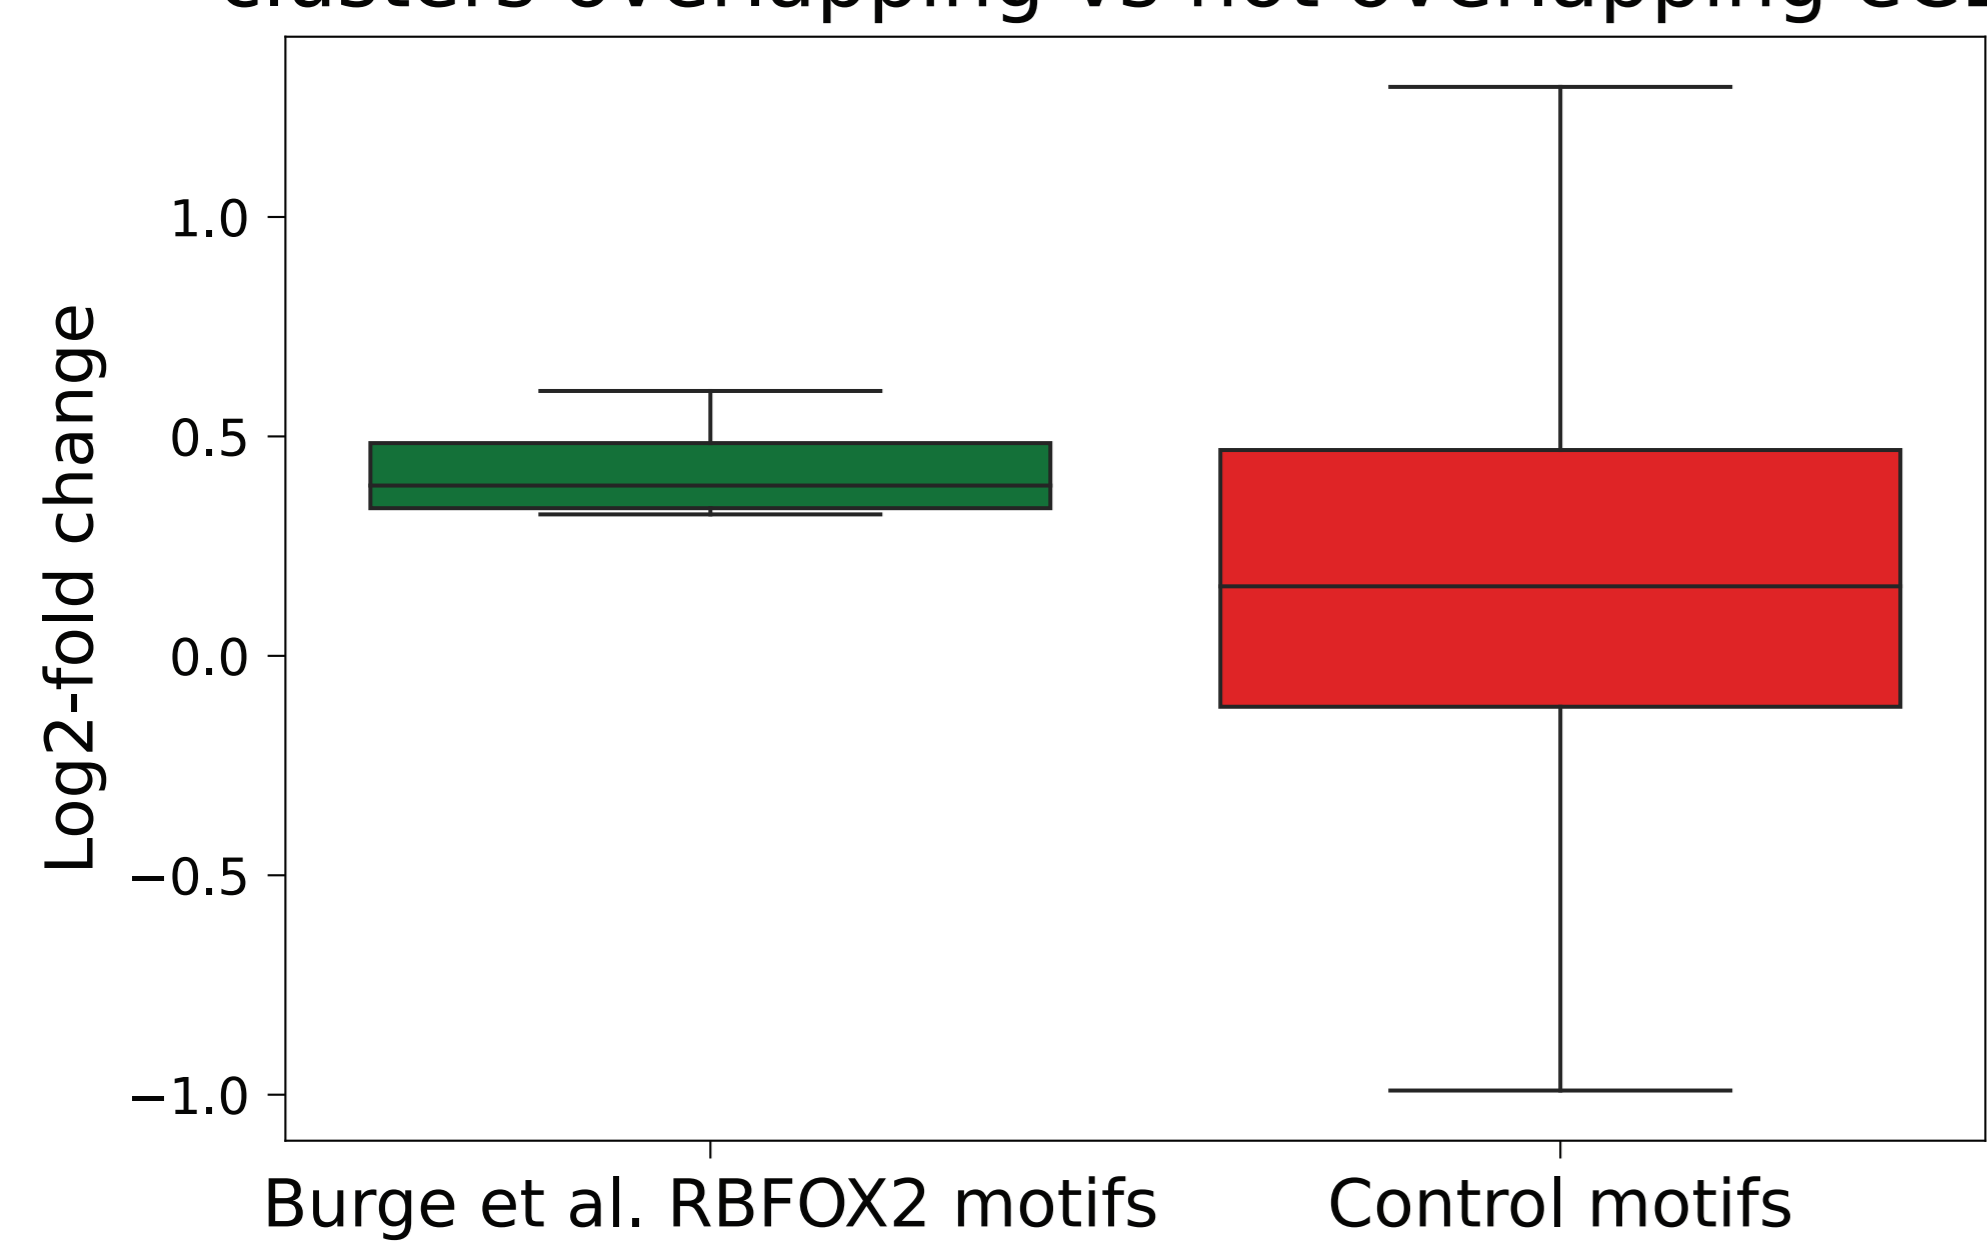**F**

Fraction of eCLIP-overlapping clusters with motif

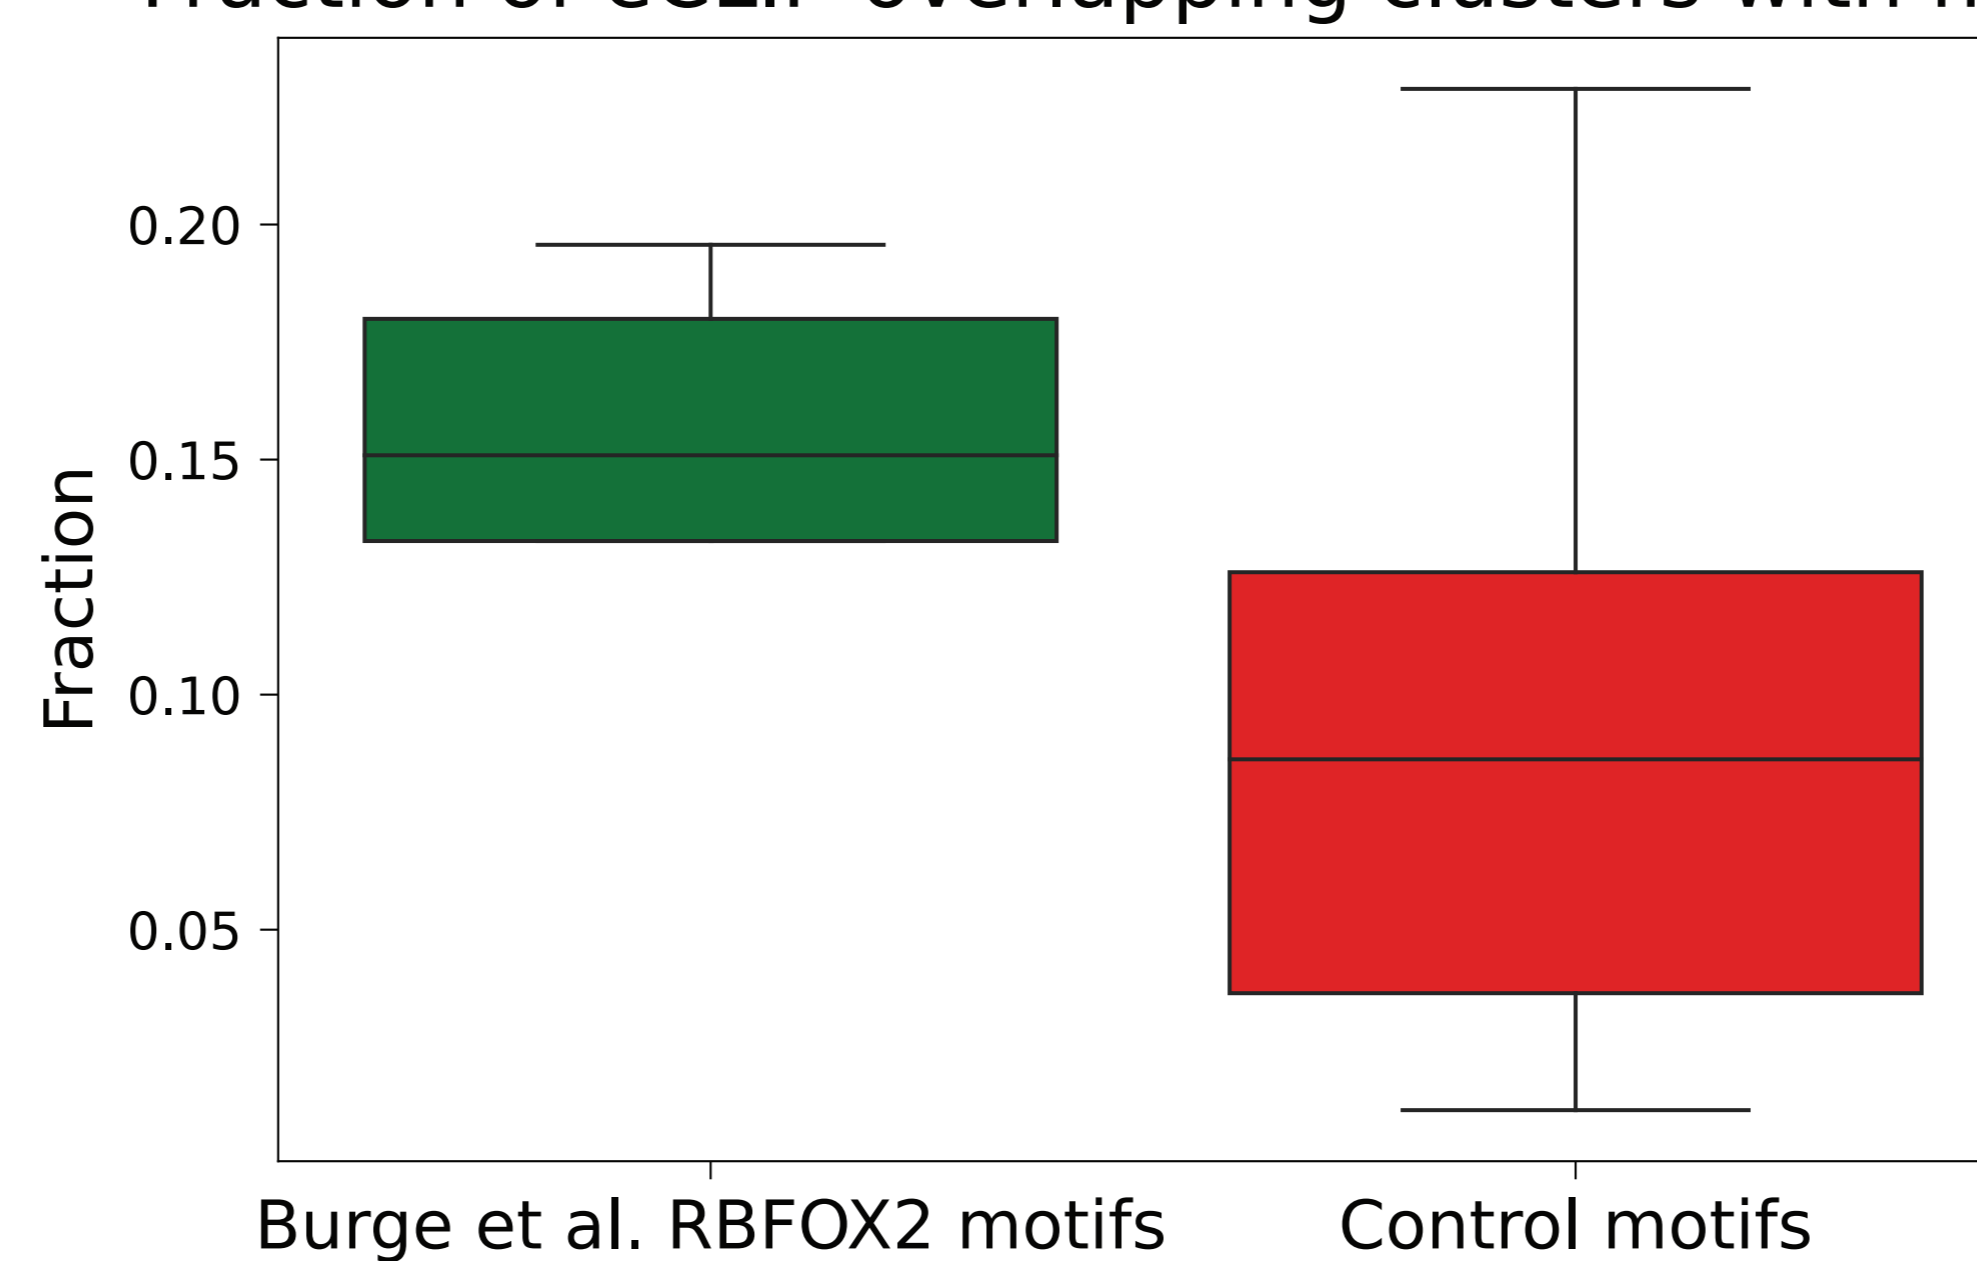**G**

Fraction of non eCLIP-overlapping clusters with motif

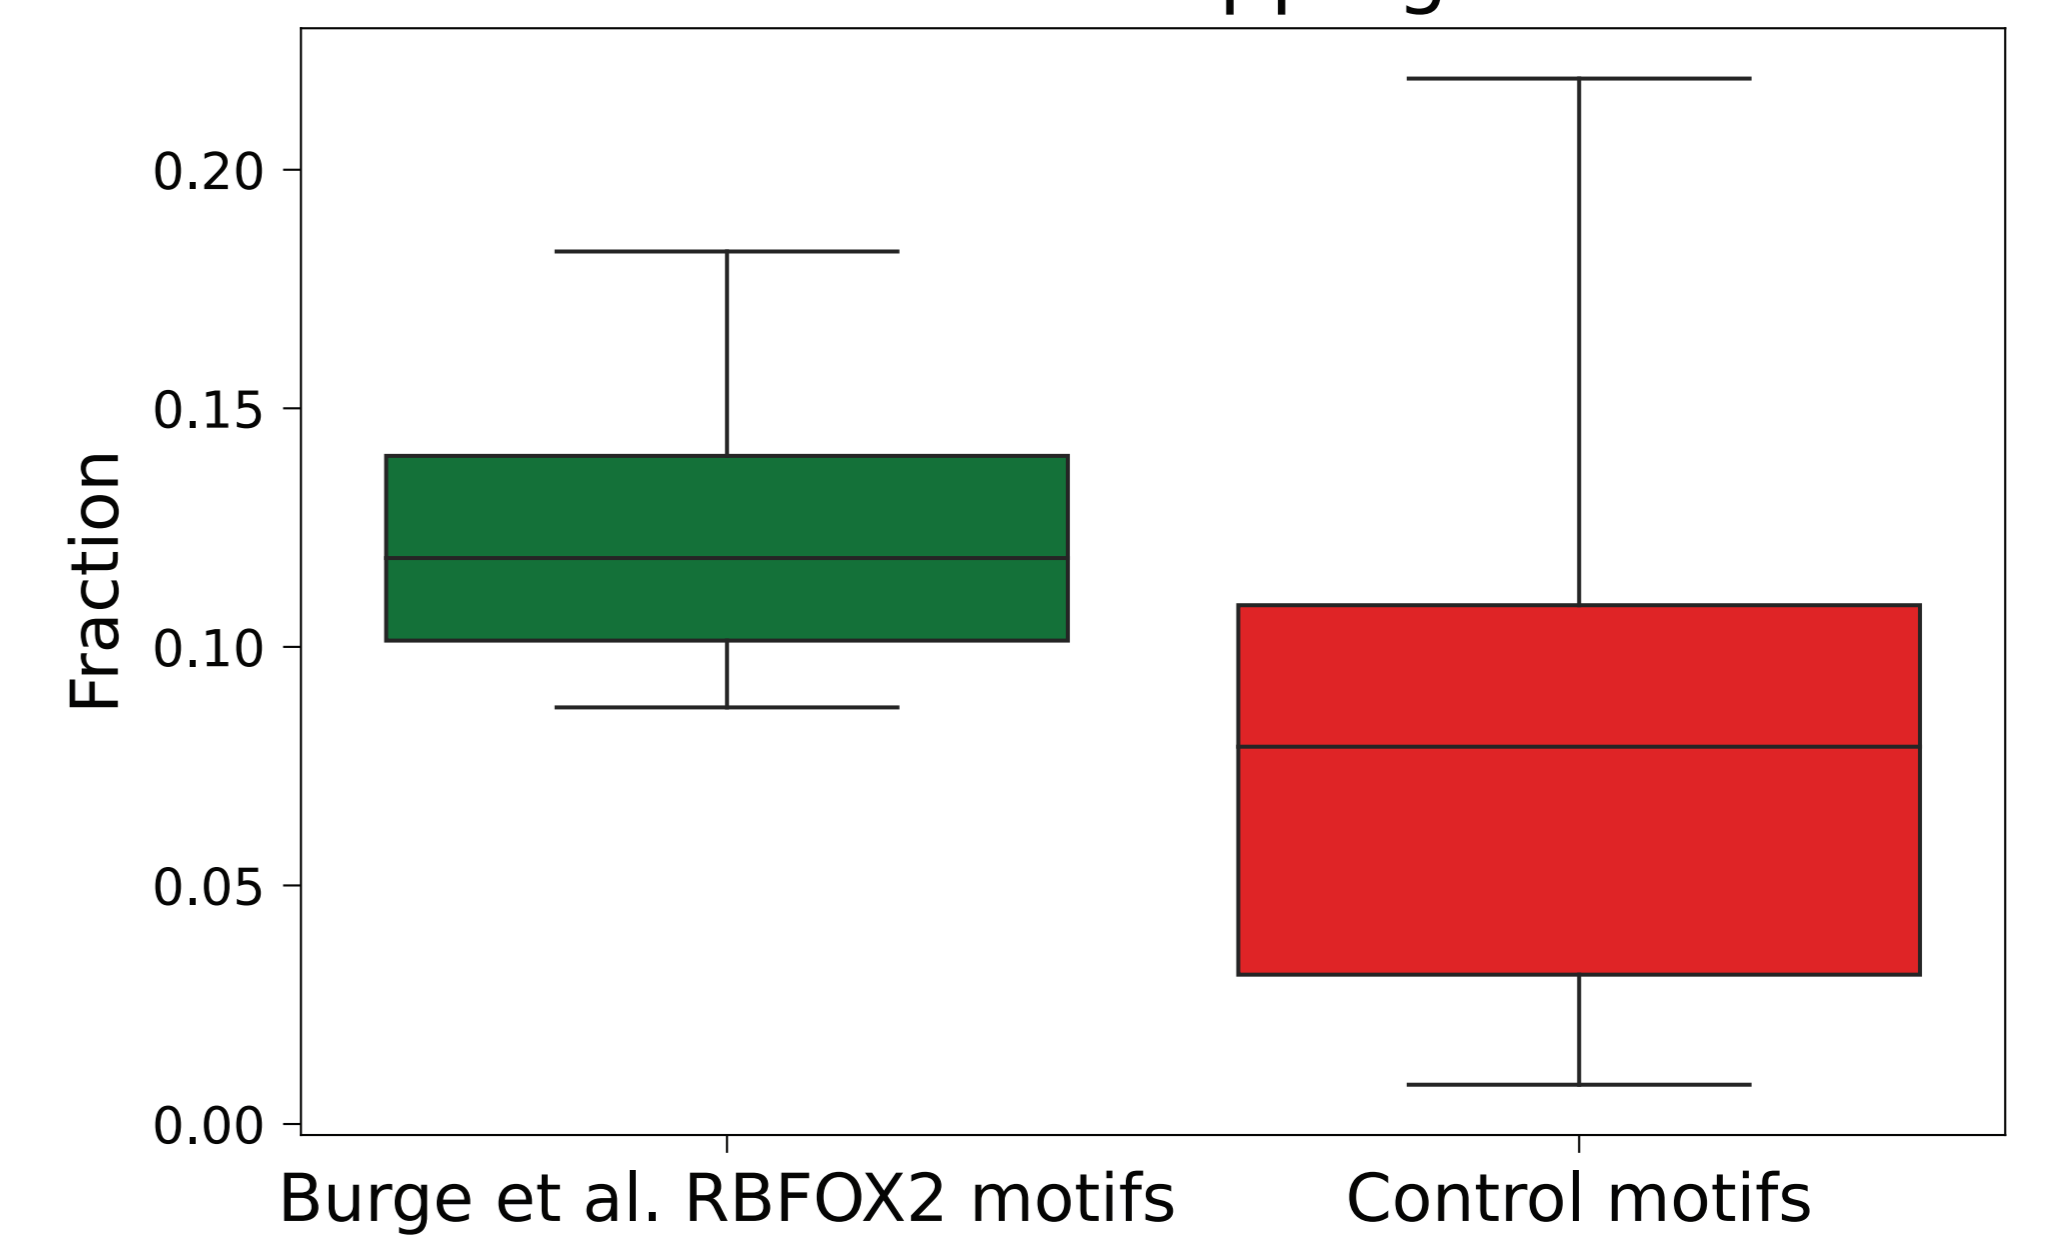**H**

Fraction of Edit Sites in Clusters

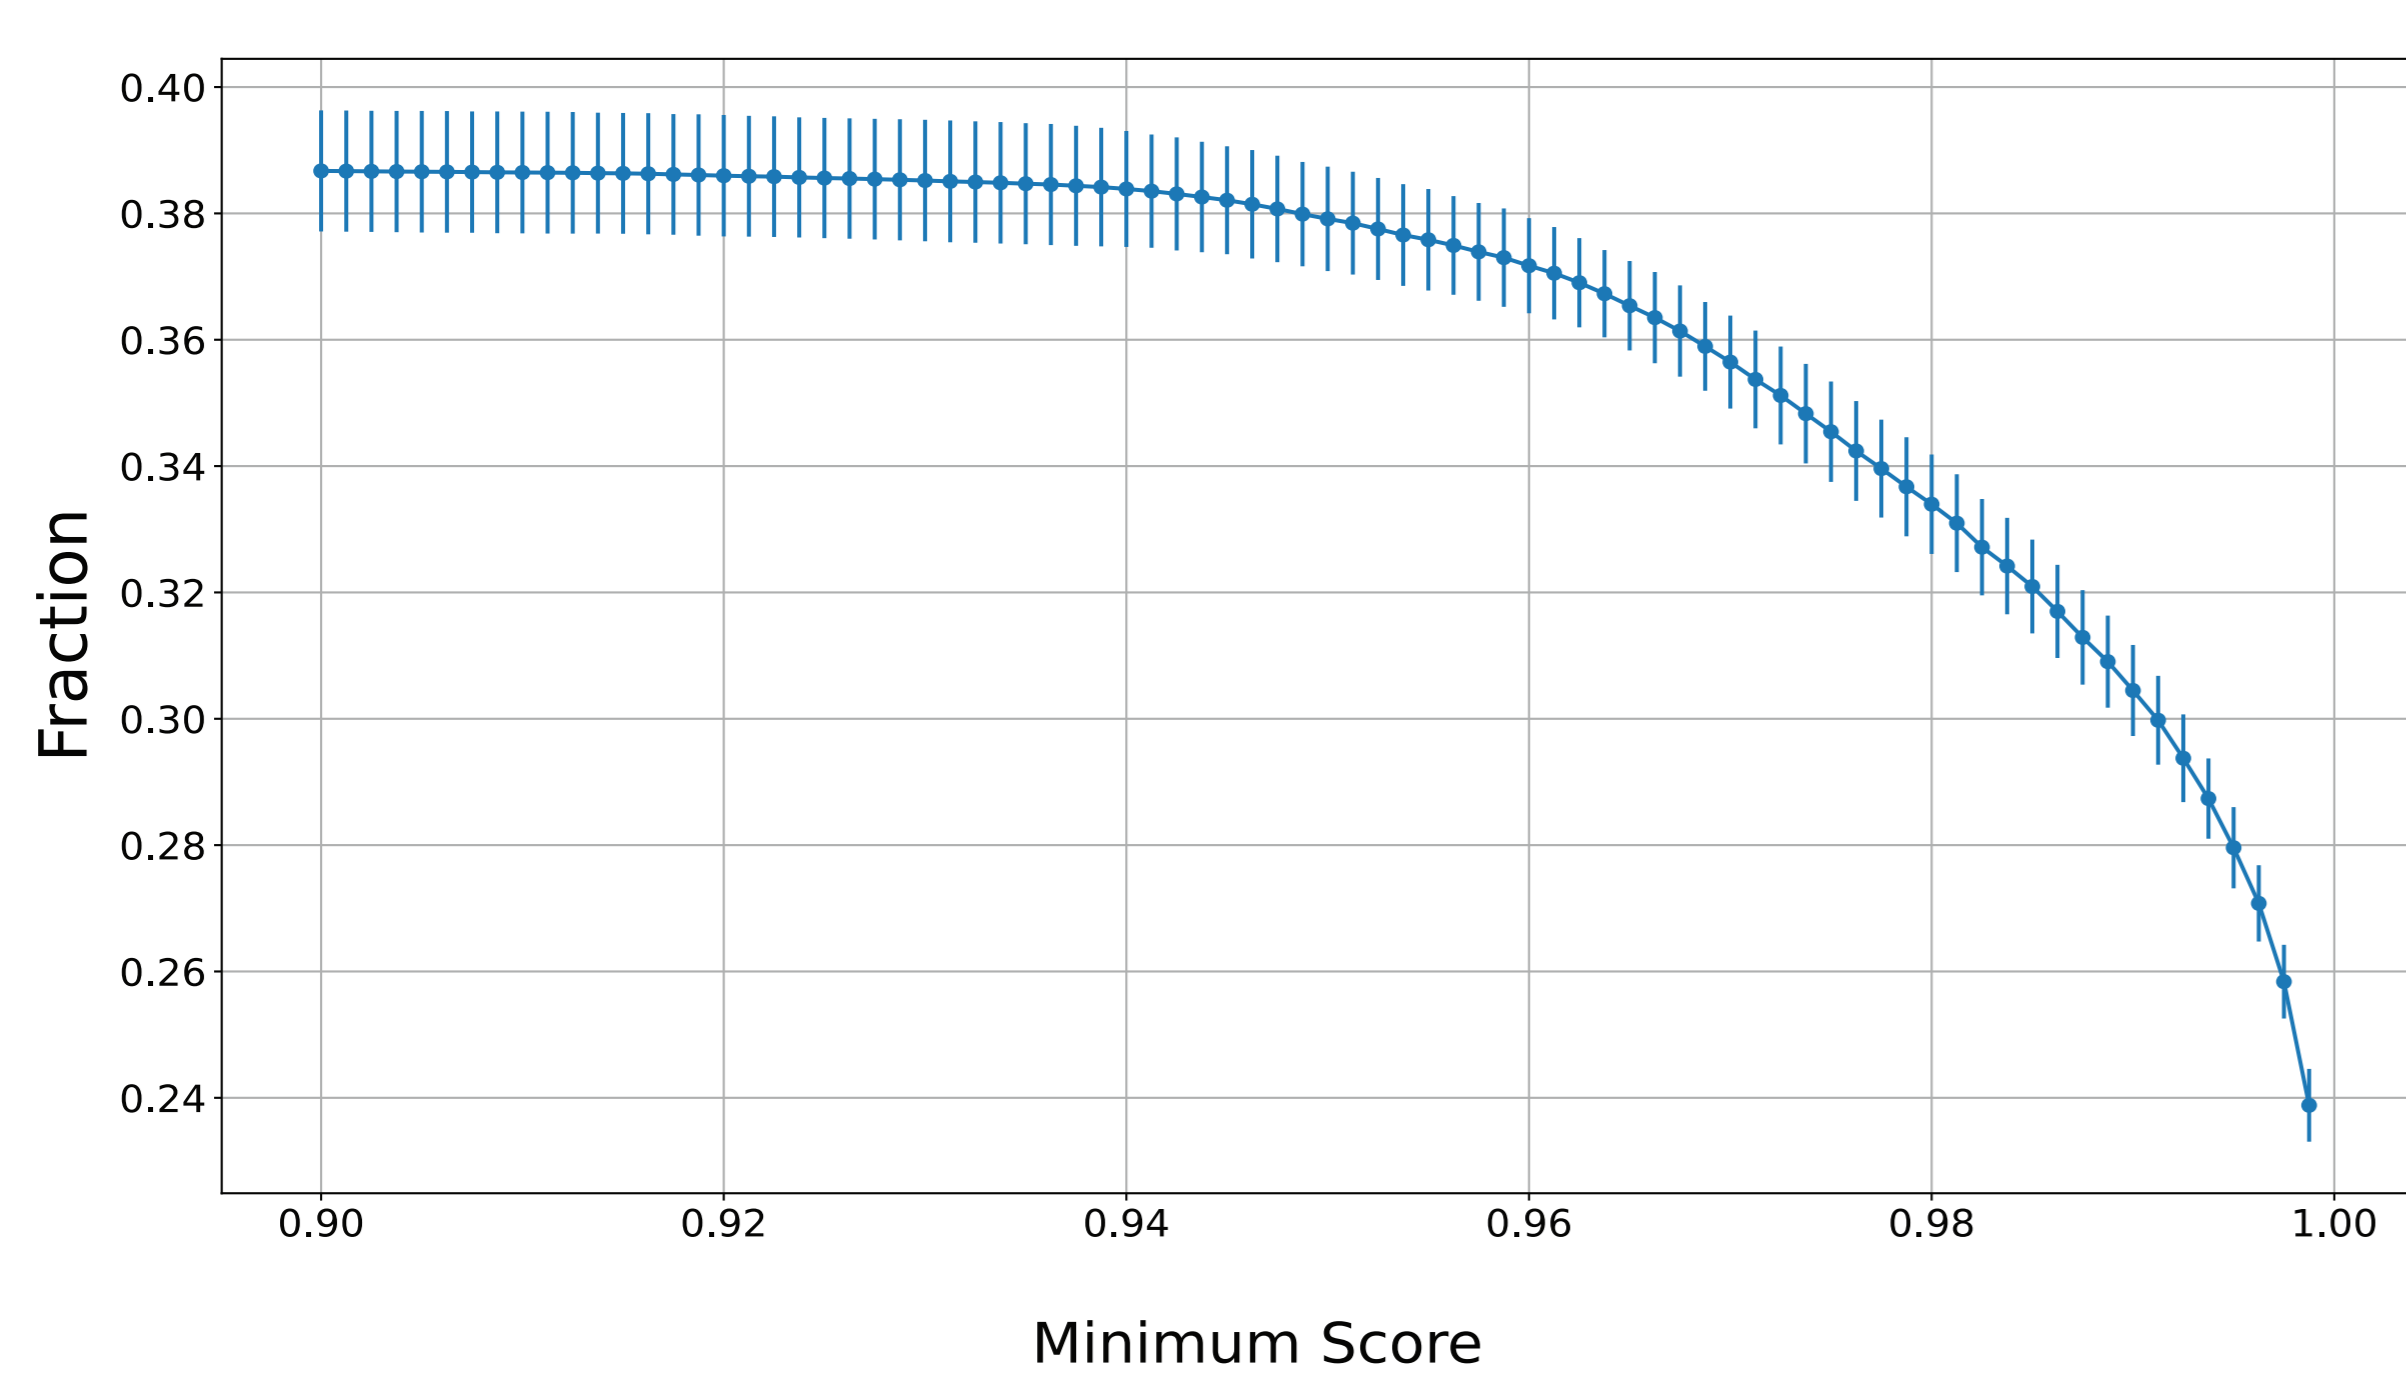**I**

Cluster Length Distribution

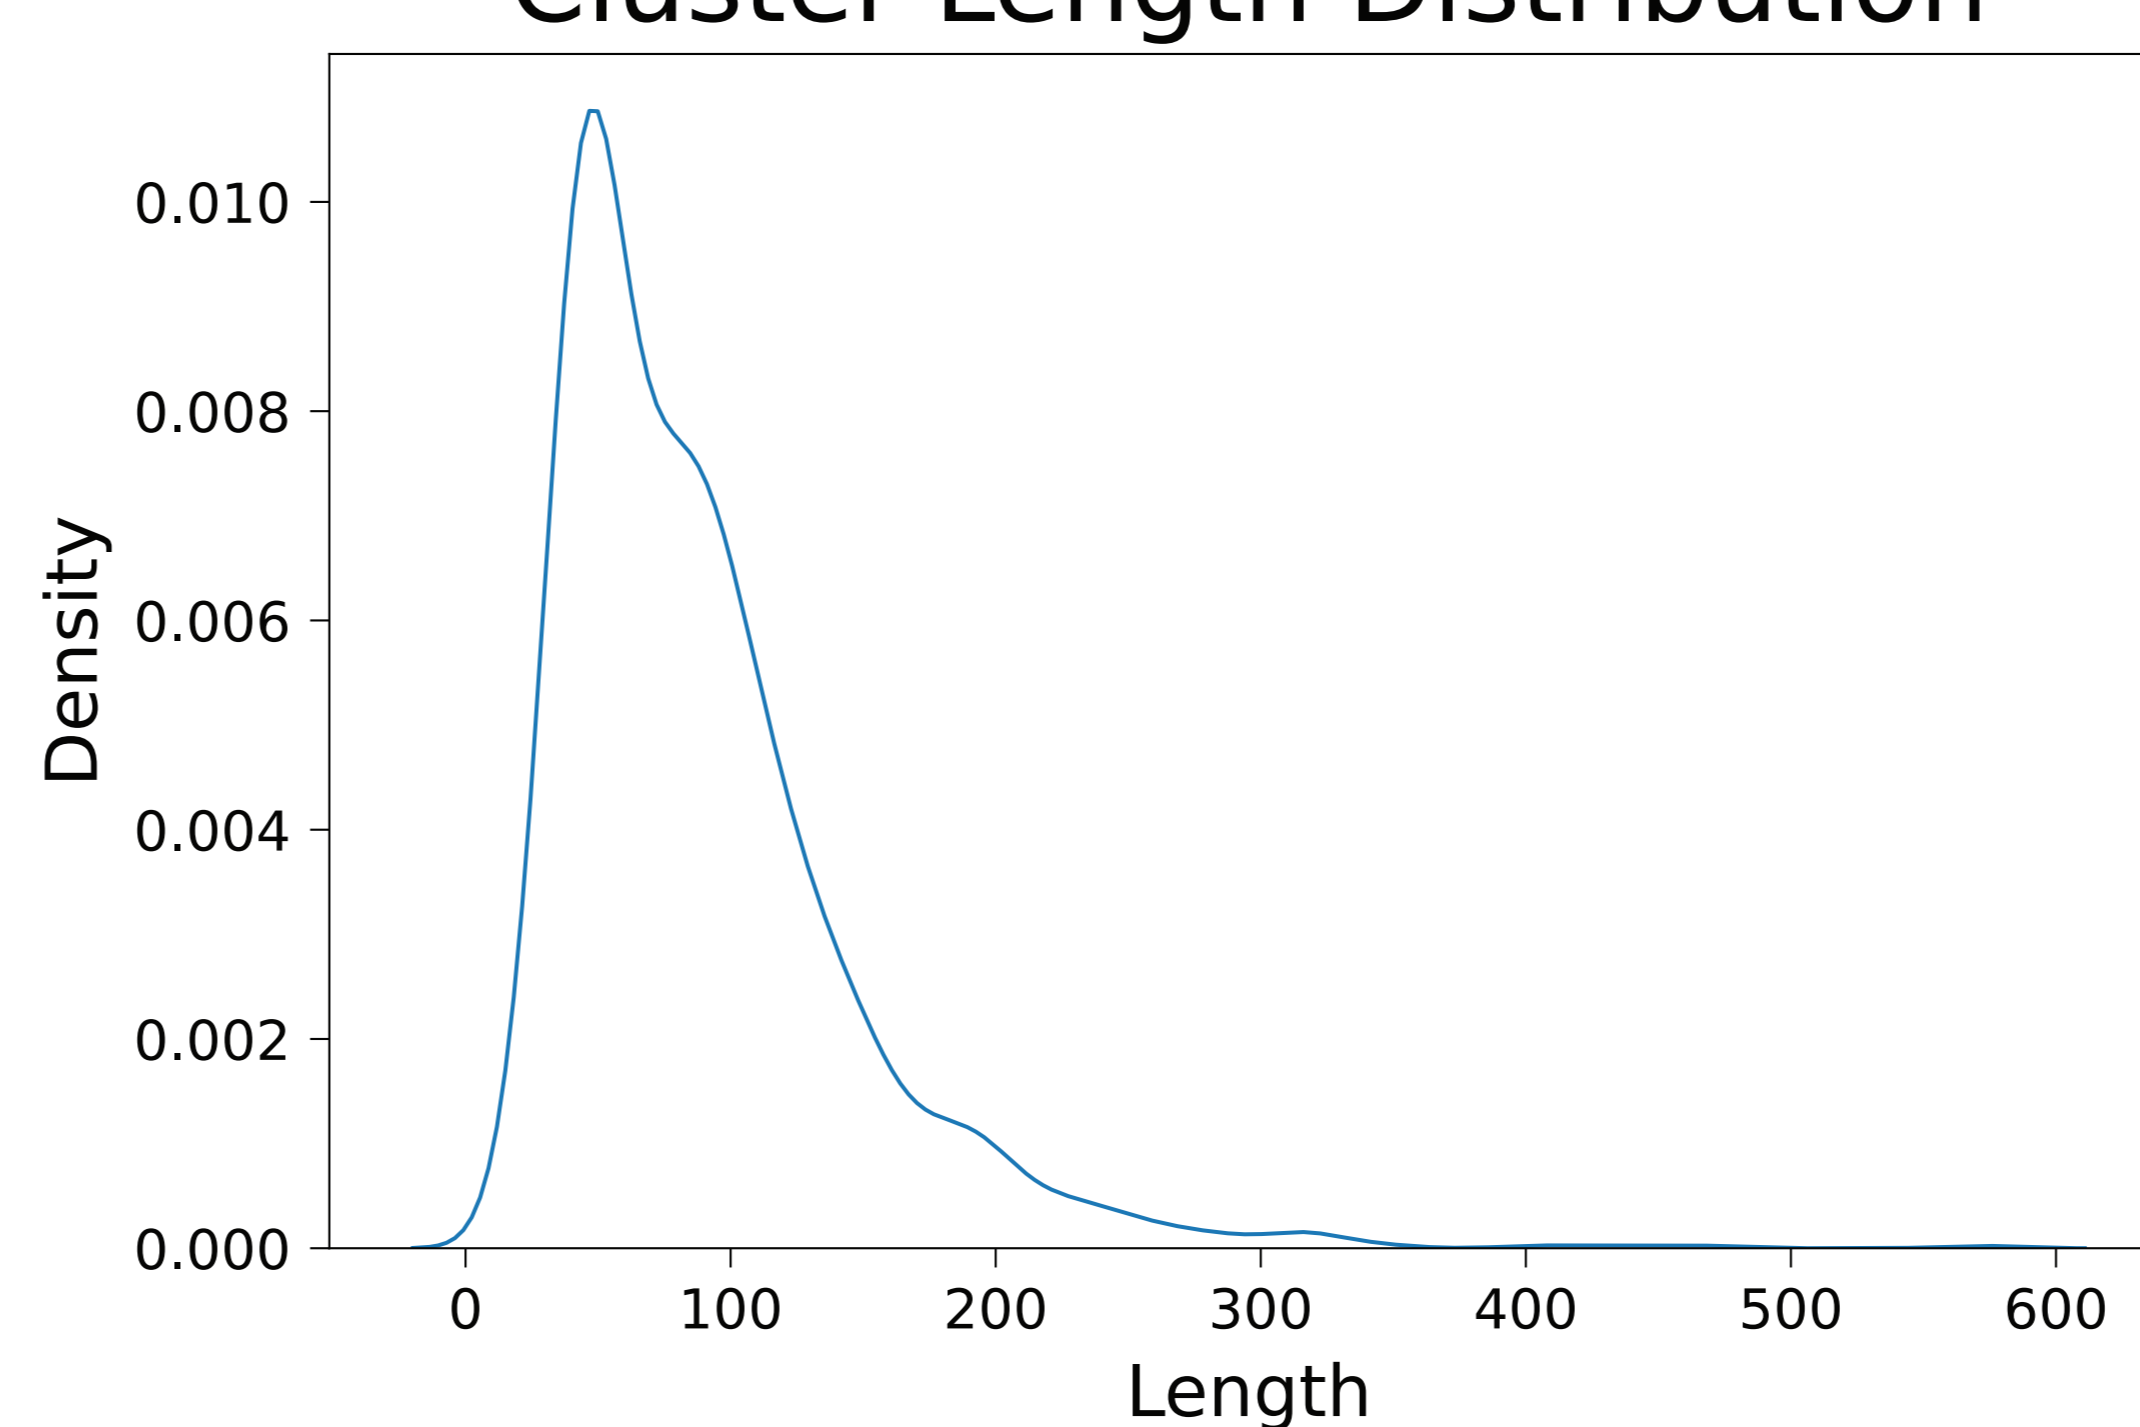

Supplement: 12859_2023_5452_MOESM2_ESM.pdf [file 12859_2023_5452_MOESM2_ESM.pdf]
