# Supplementary material for: FLARE: a fast and flexible workflow for identifying RNA editing foci
Source: PubMed Central journal article supplement (PMC10544219; doi:10.1186/s12859-023-05452-4), 2023-10-02

A

Actual vs permuted fraction of STAMP peaks overlapped by eCLIP

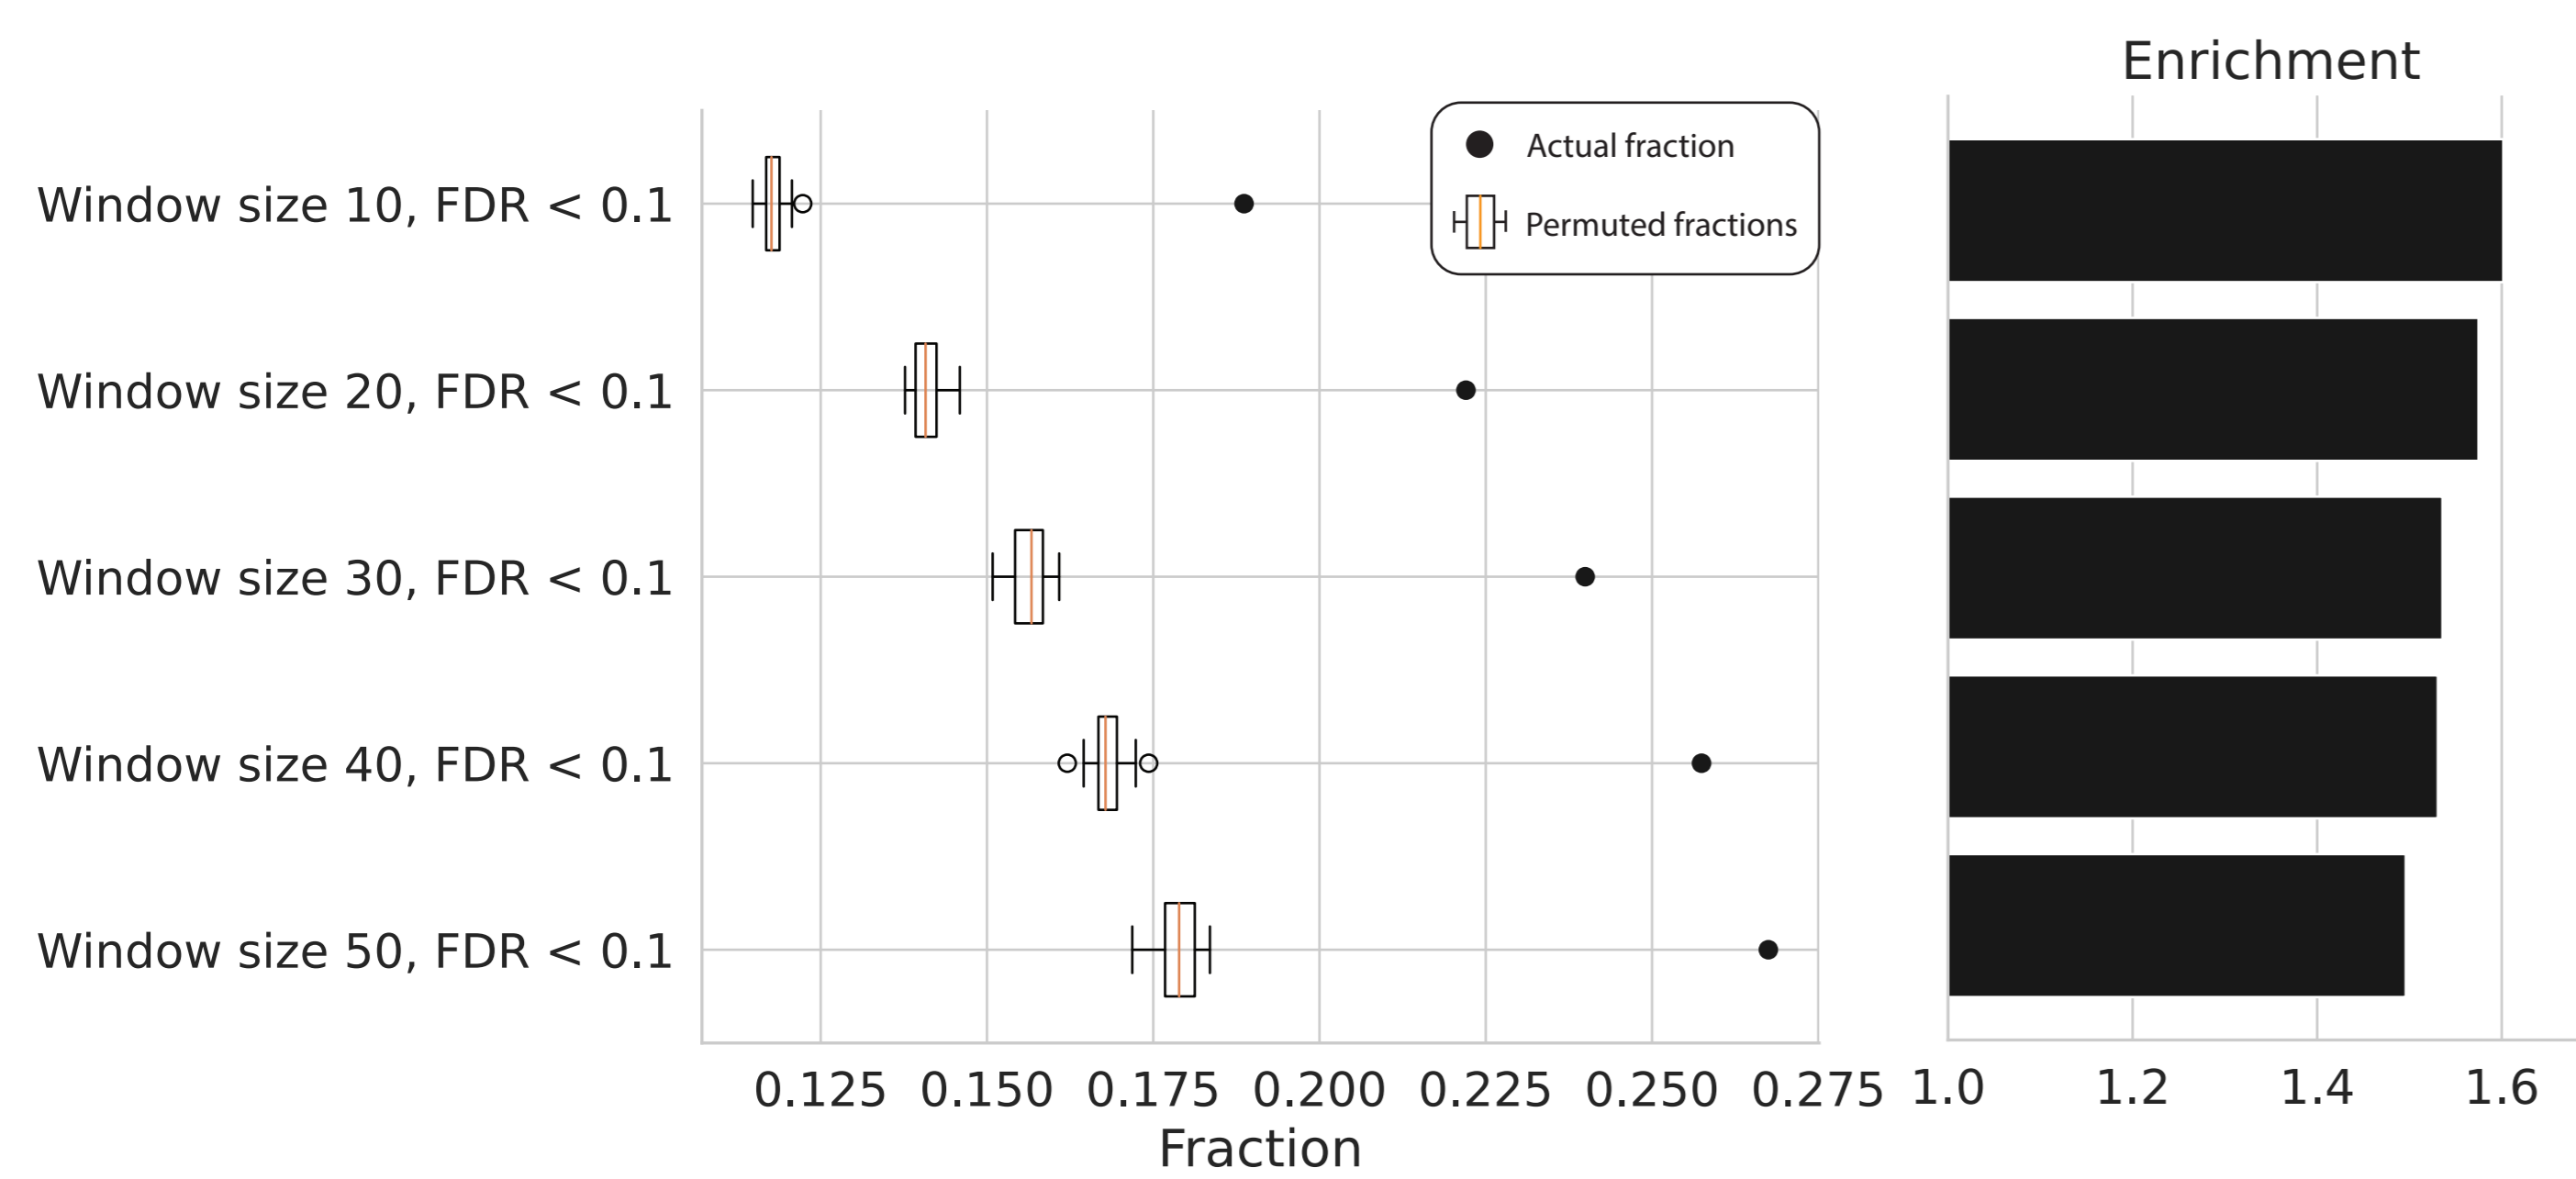

B

Actual vs permuted fraction of STAMP peaks with GCATG motif

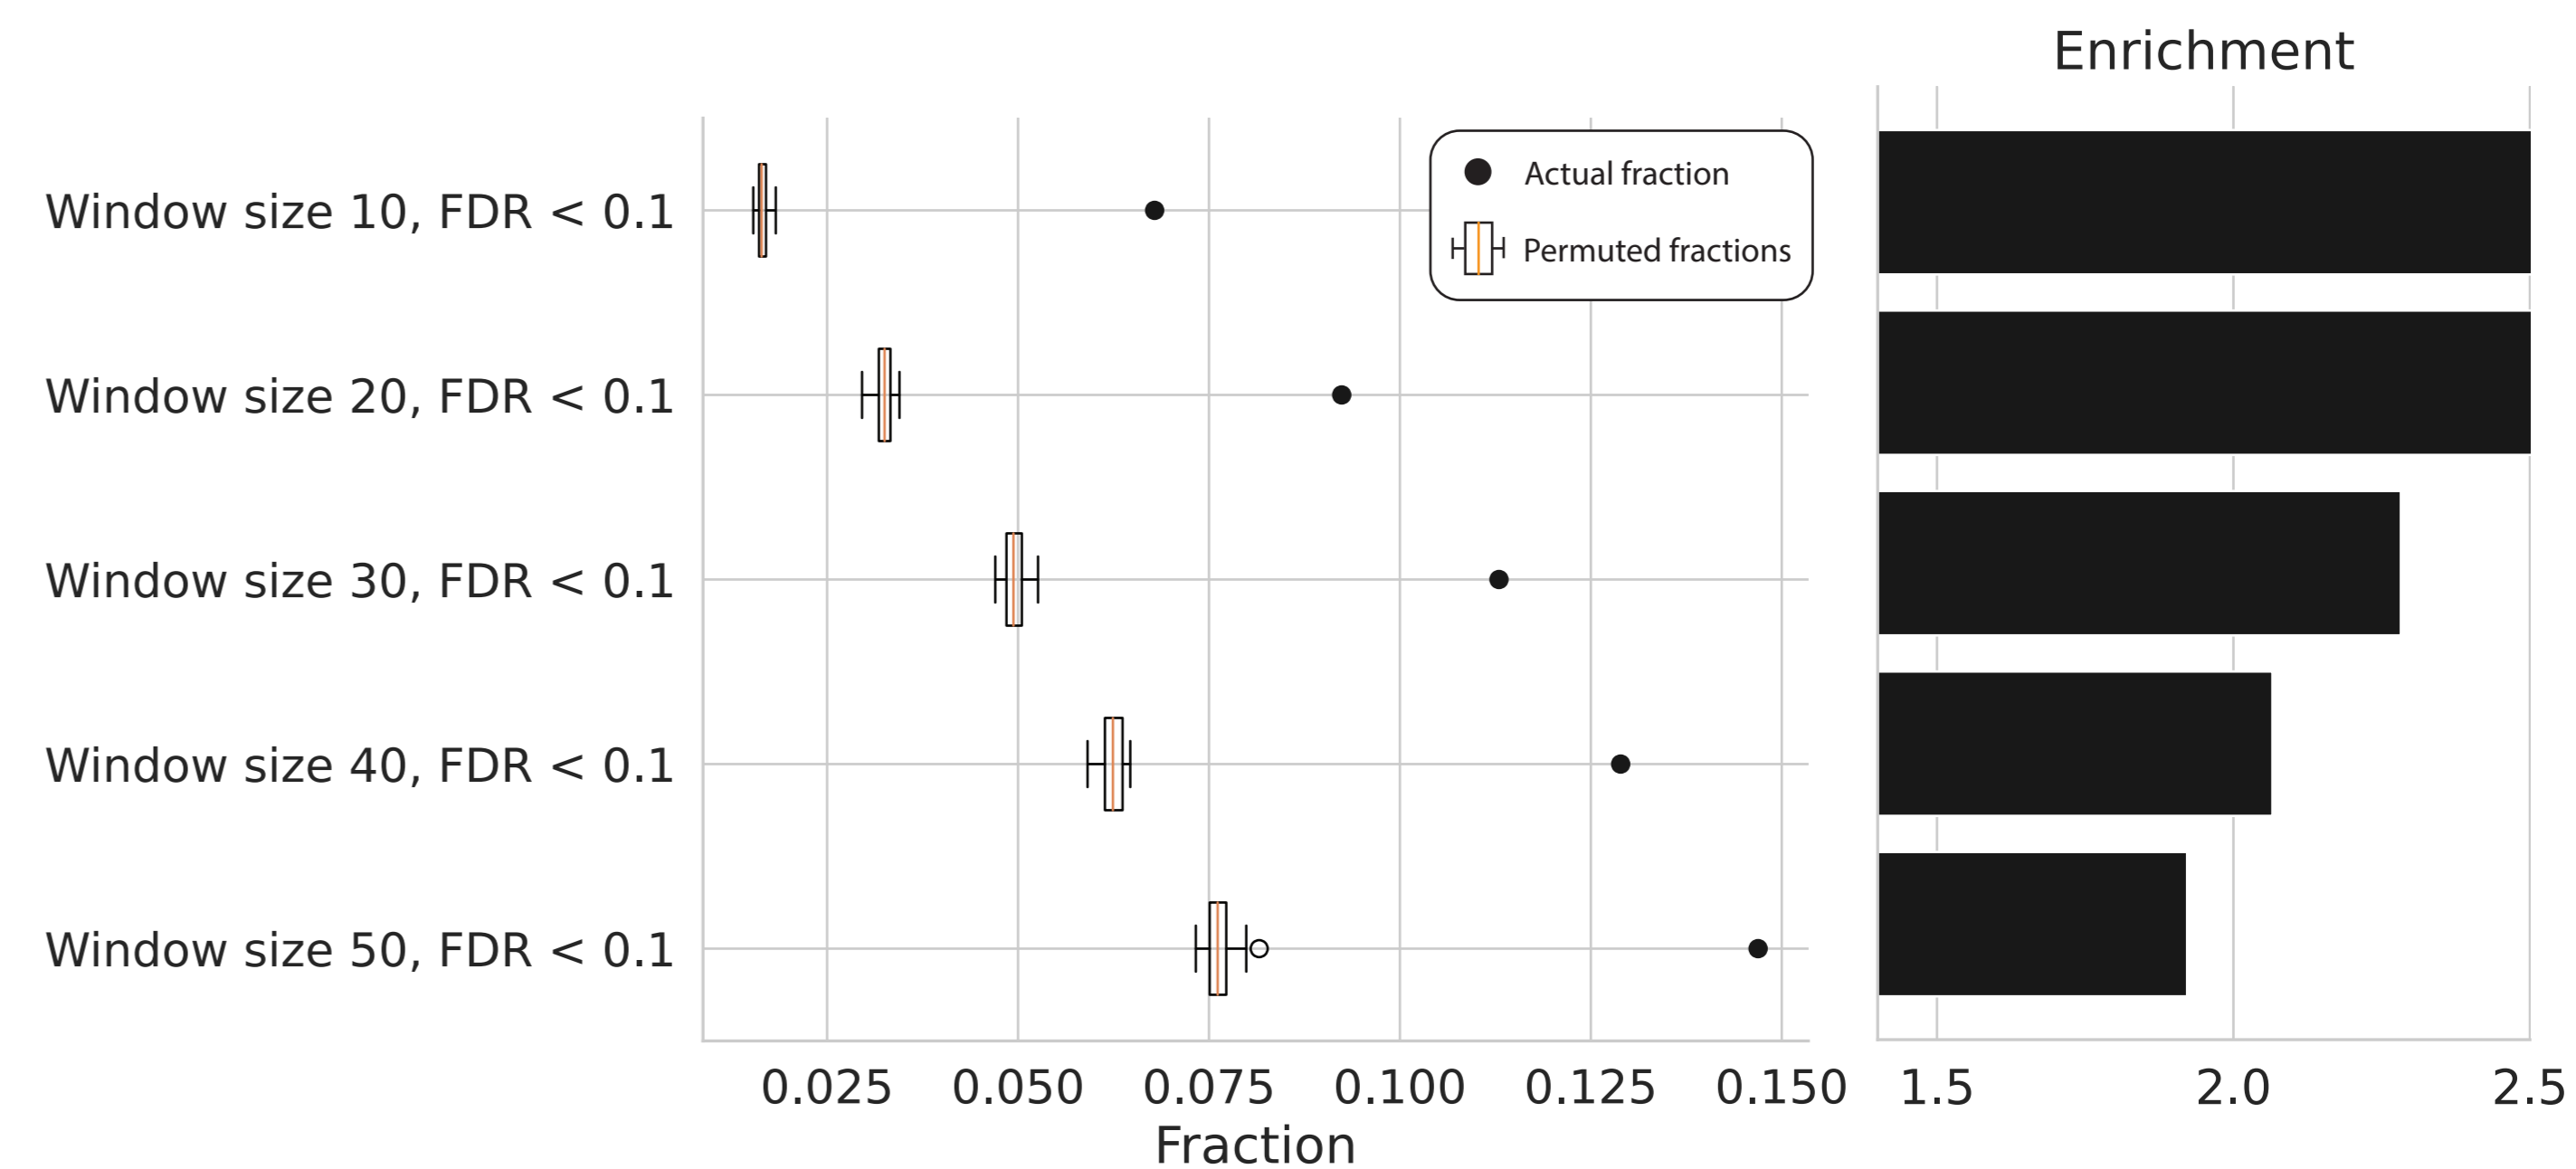

C

Fraction of final peaks with supporting evidence by window size

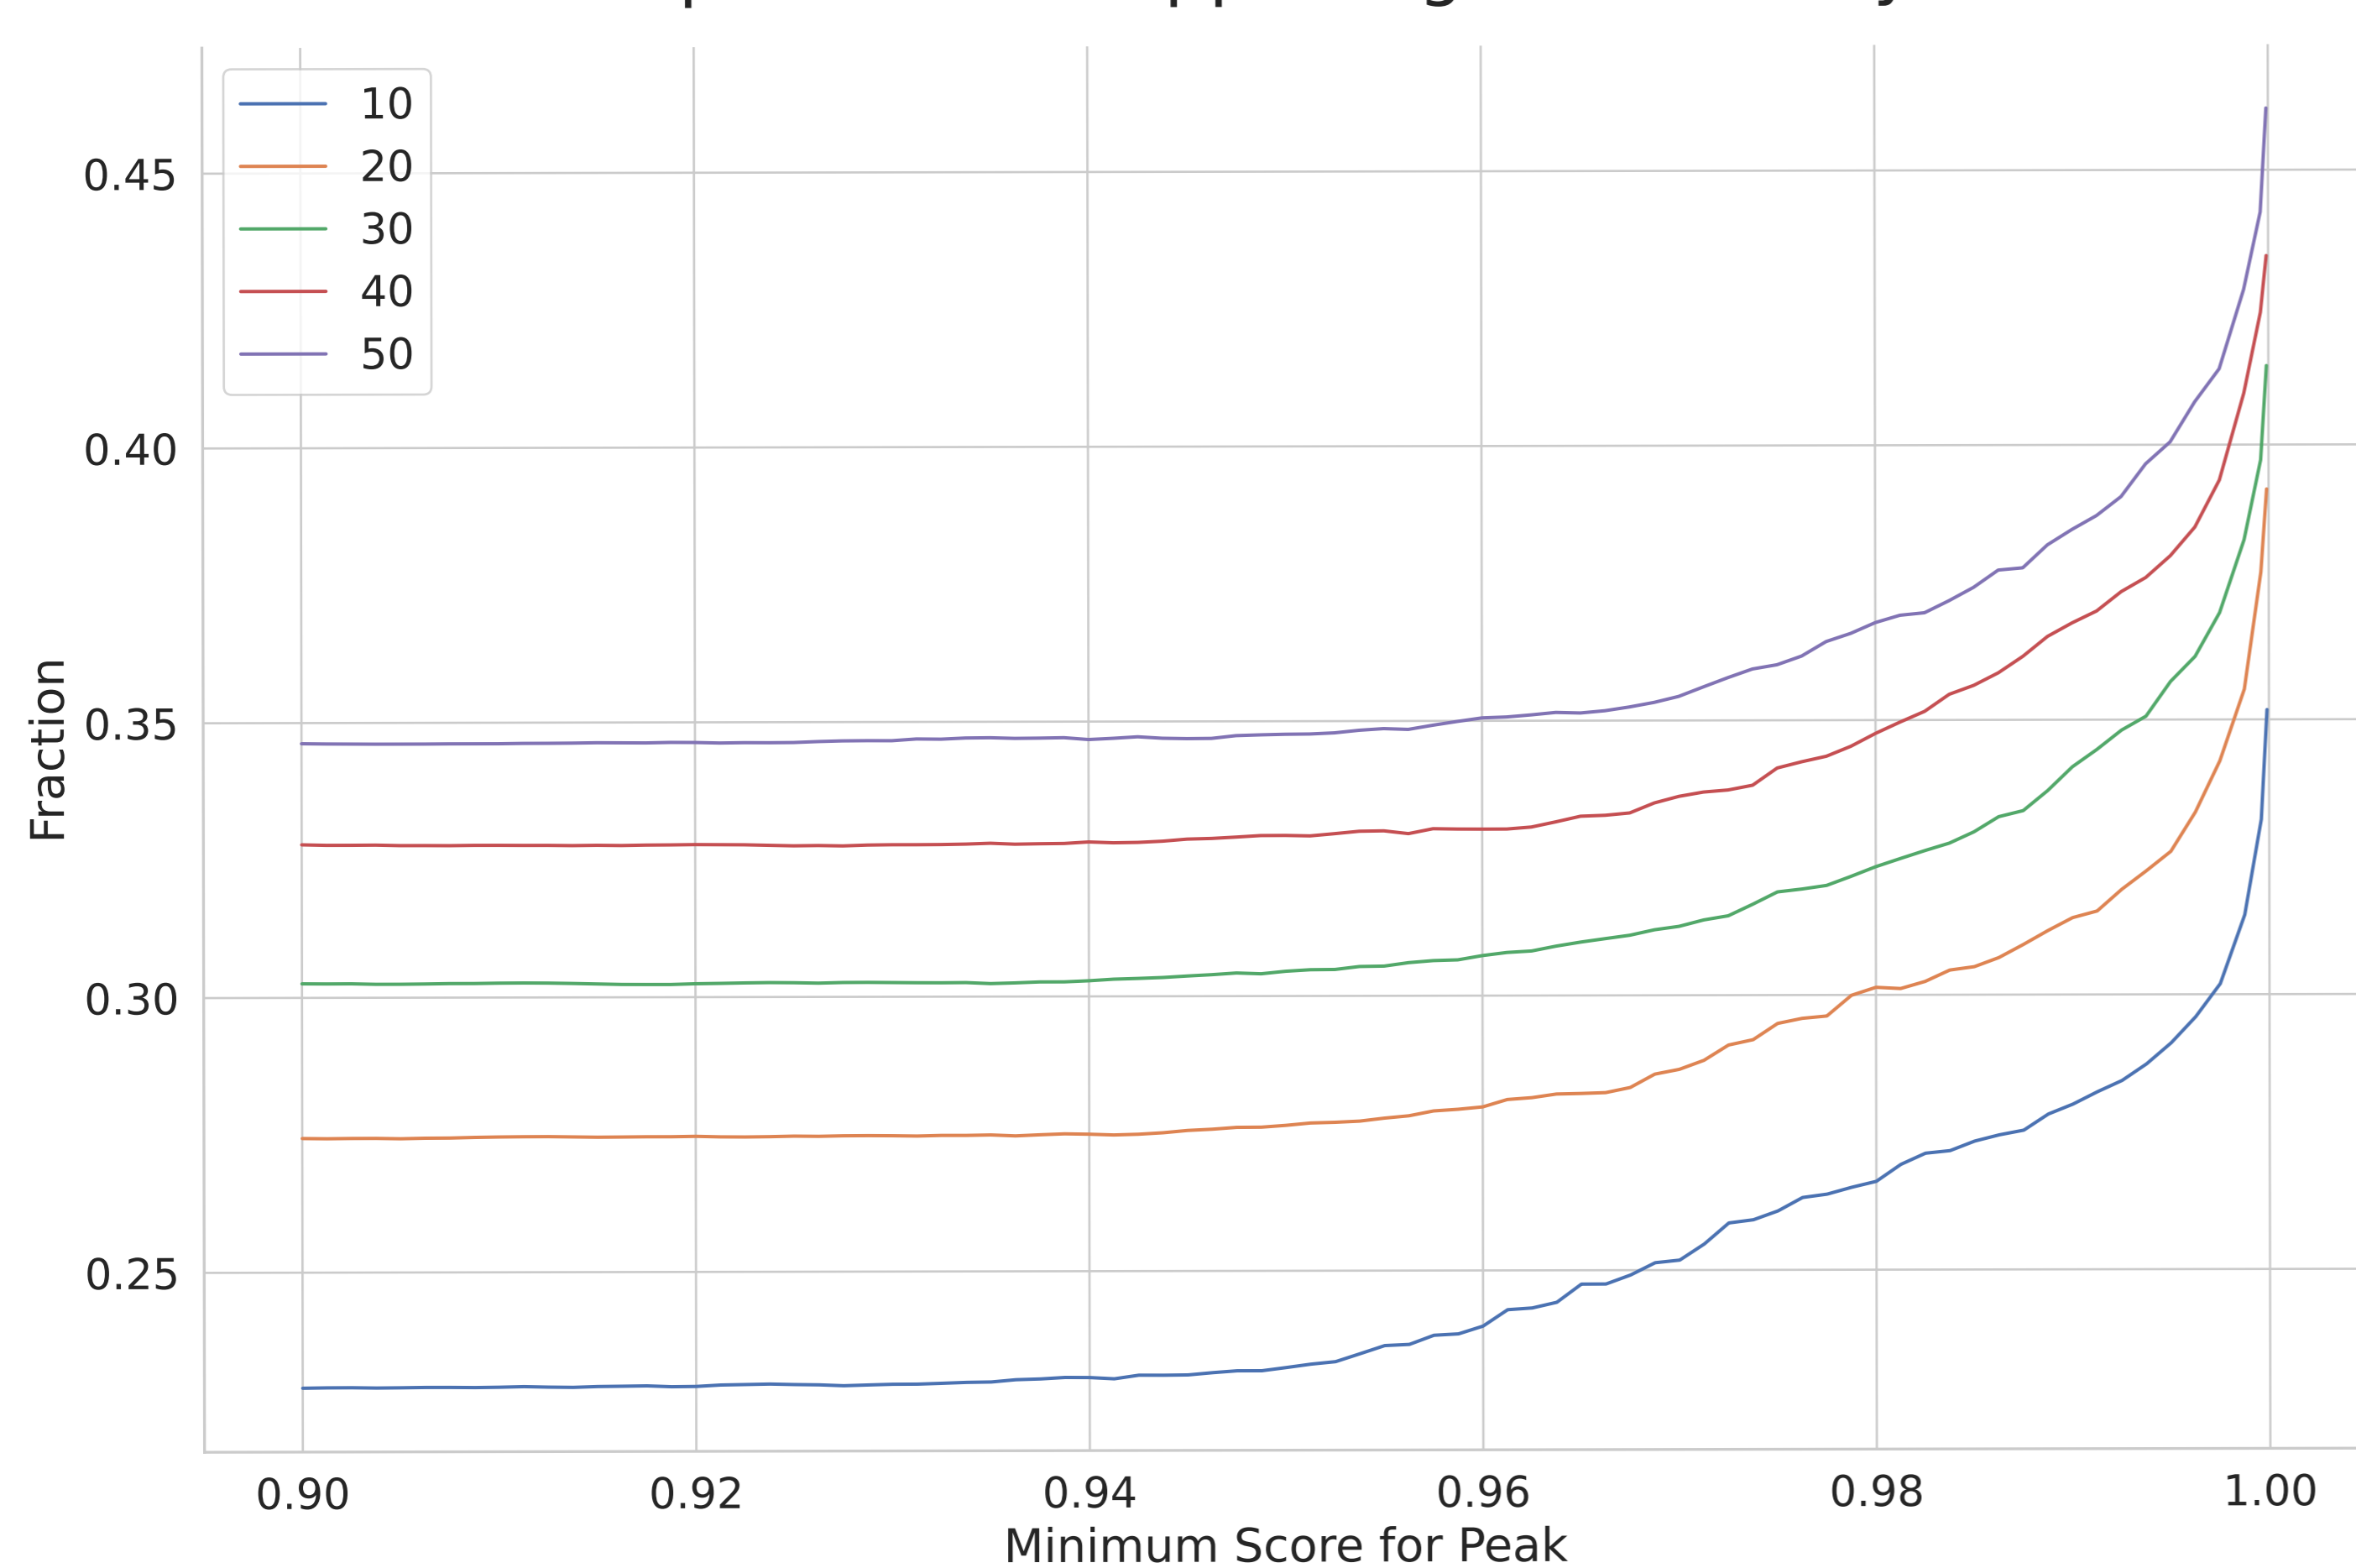

D

Number of peaks by window size

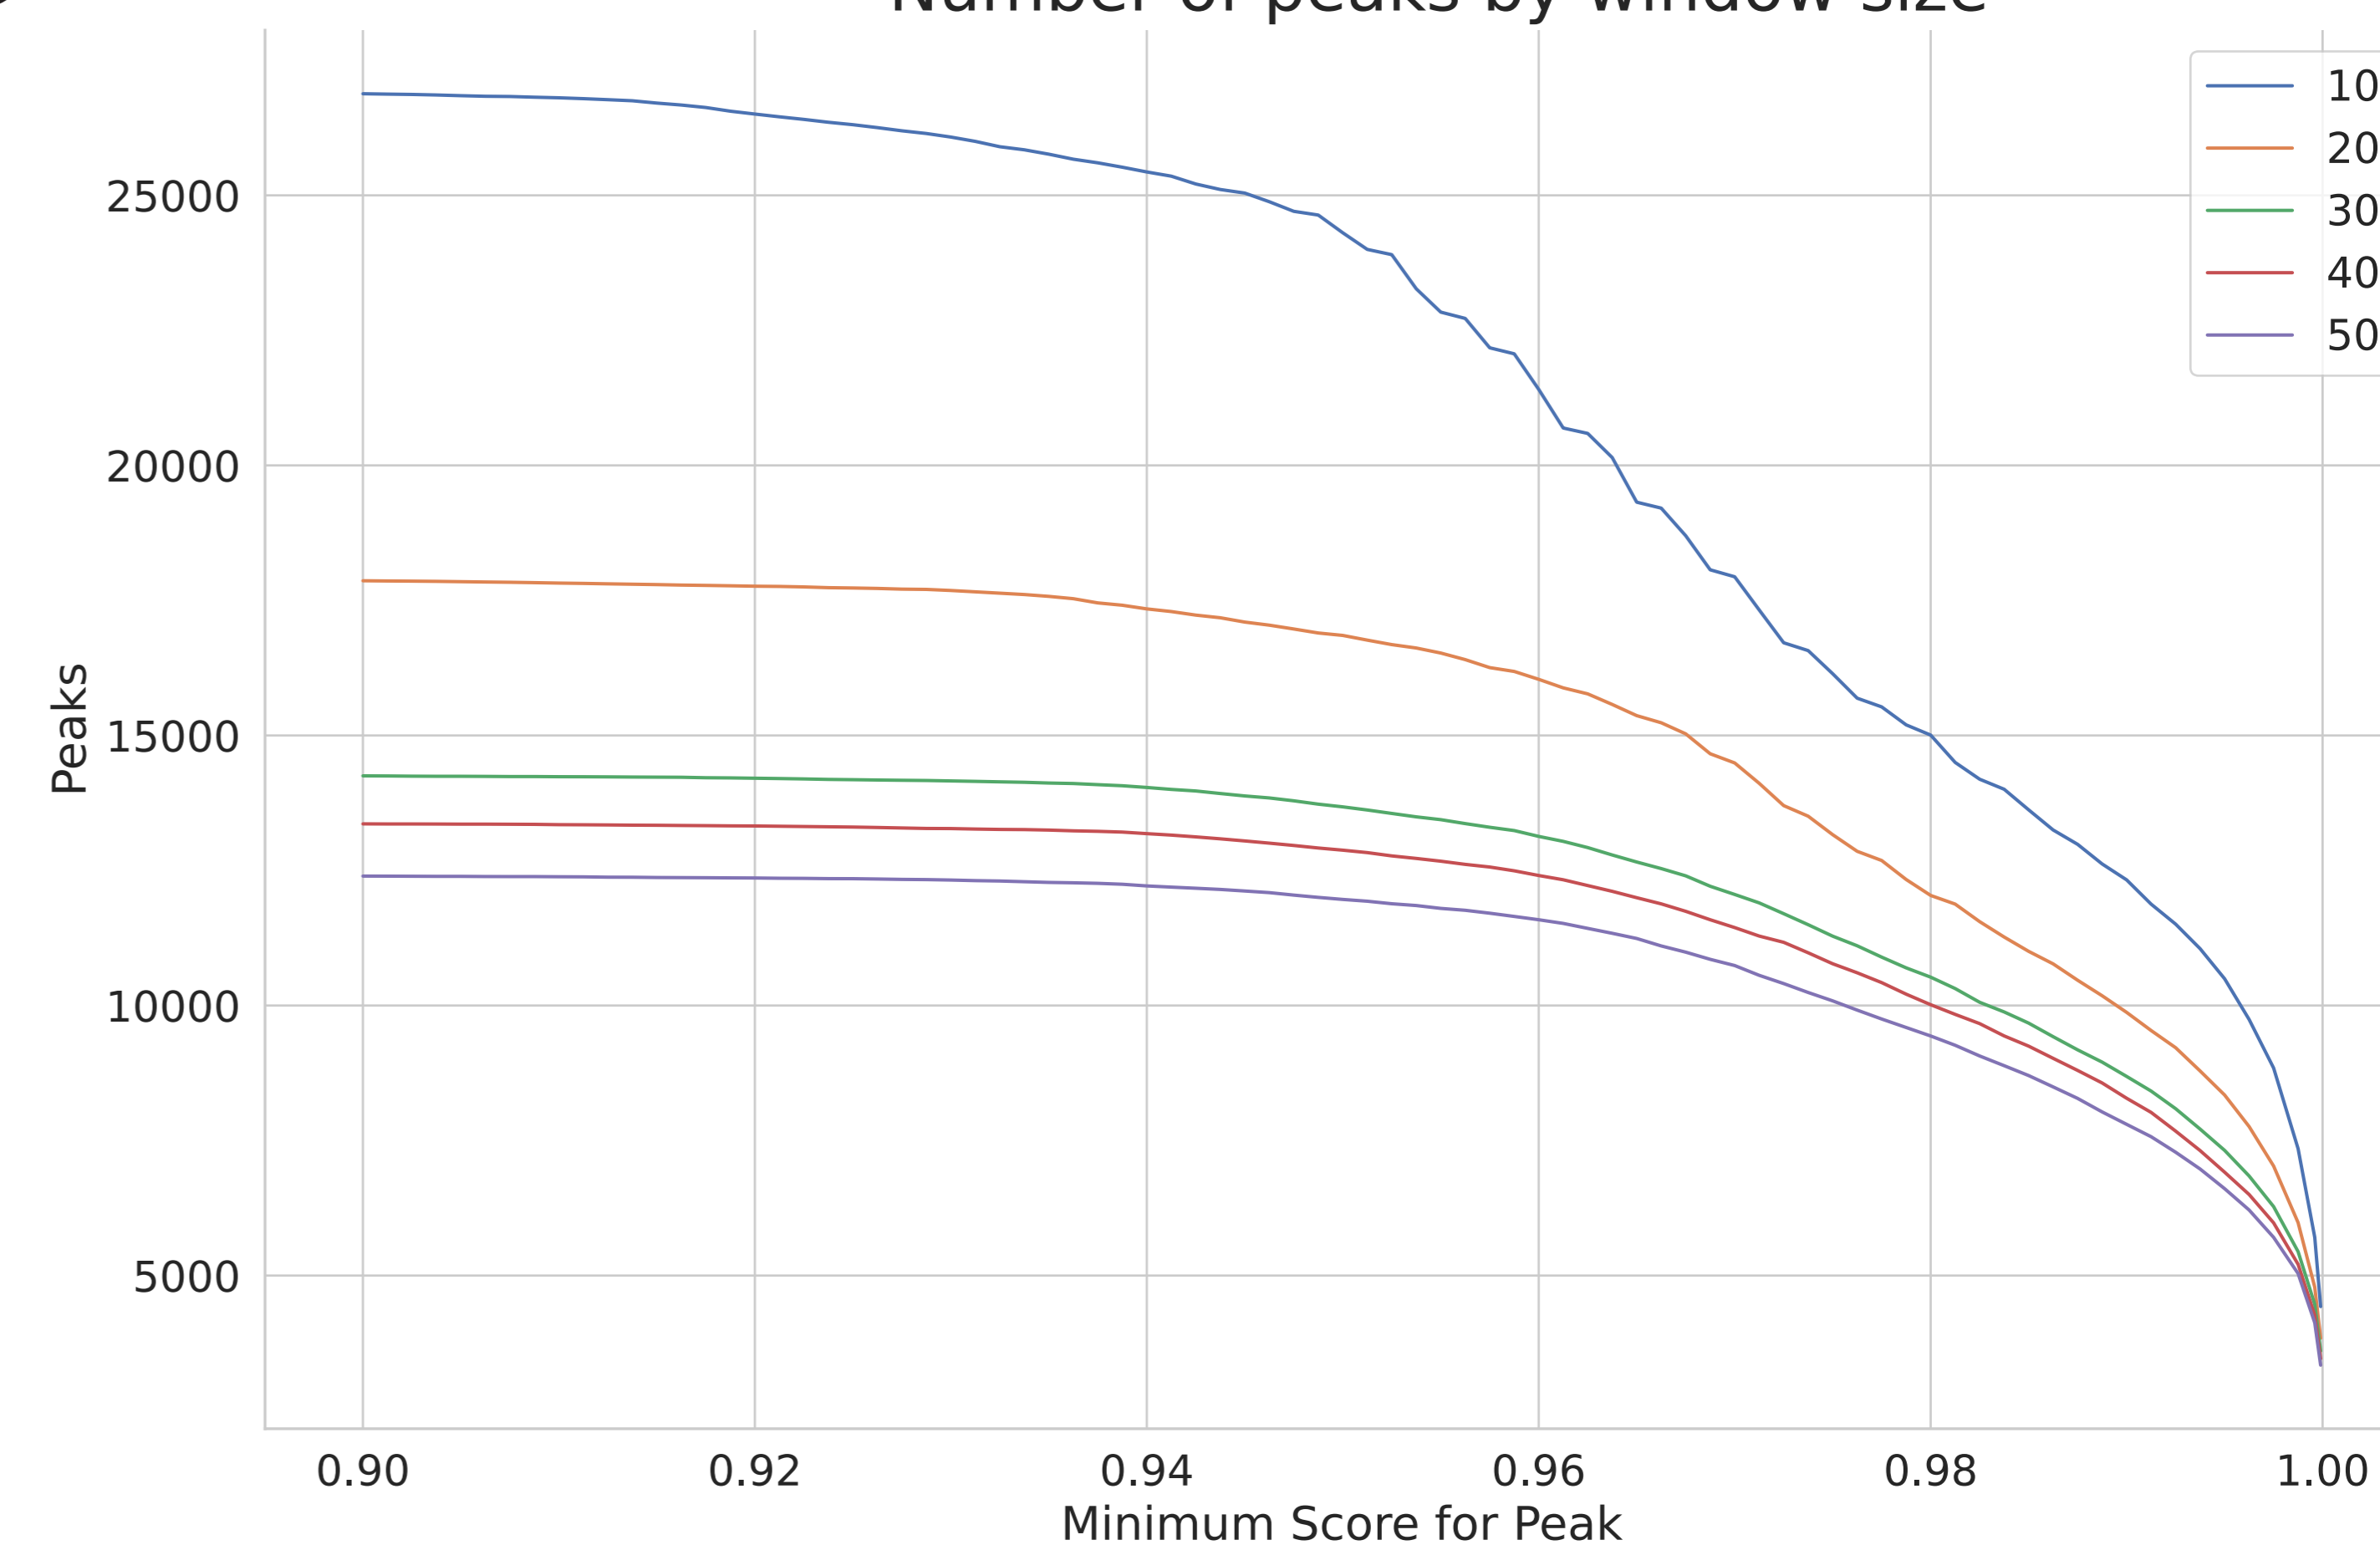

E

$$\text{Efficiency score (window size)} = \frac{\text{sites per cluster} \times \text{window size}}{\text{total area covered by clusters} \times \text{window size}}$$

Clustering efficiency by window size

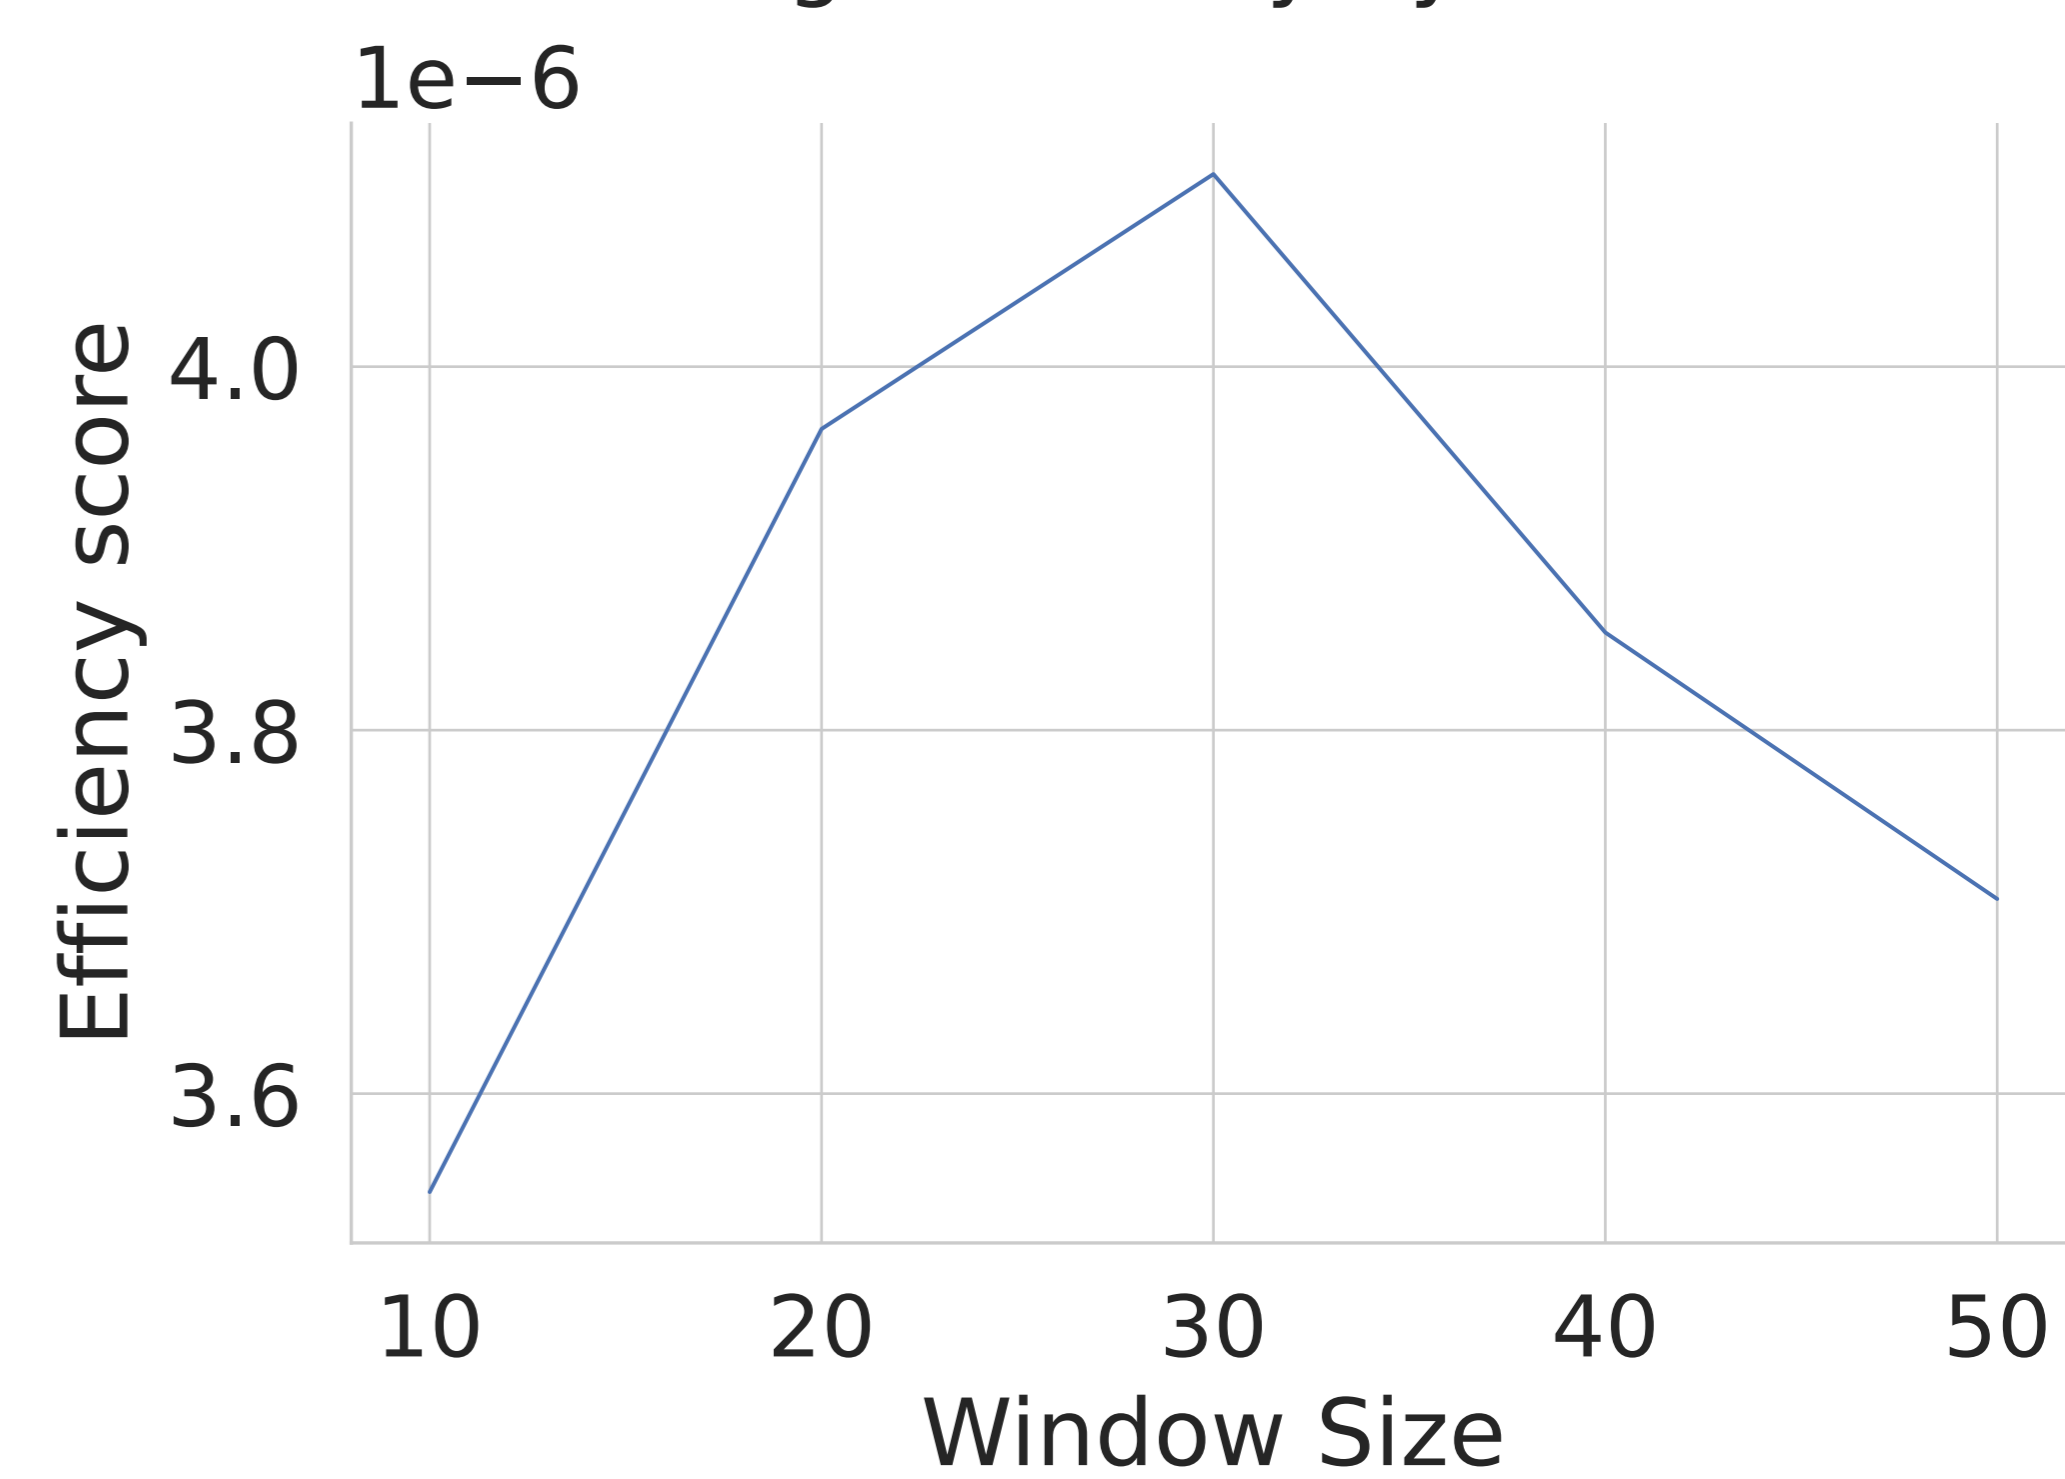

Supplement: 12859_2023_5452_MOESM4_ESM.pdf [file 12859_2023_5452_MOESM4_ESM.pdf]
